# Supplementary material for: Impact of powder and electrode ALD coatings on the performance of intercalation cathodes for lithium–ion batteries
Source: Royal Society of Chemistry journal article supplement (doi:10.1039/d4ya00583j), 2025-01-01
Supplement: d4ya00583j1.xlsx [file d4ya00583j1.xlsx]

## Sheet: Al2O3
#	Materials		ALD features					Electrochemical cycling conditions									Capacity at cycle (long-term), mAh/g			Ratecap test		Source data
	Electrode material	Coating material	Type of coating (P/E)	ALD conditions: precursors, T, reactor type	# ALD cycles	Growth rate, Å/cycle	Thickness, nm	Active material, wt%	Active material mass loading, mg/cm2	Negative electrode	Potential range, V	Temperature, °C	Charge current rate, C-units	Discharge current rate, C-units	Measurements in CCCV mode	Current at 1C, mA/g	1st	100th (if available)	largest (number of cycles), "-" if exactly 100	max C-rate, C-units (C-charge, D-discharge)	1st cycle capacity	Ref (DOI)	Year
LCO
1	LCO	-	-	-	-	-	-	83	?	Li	3.3-4.5	RT	1	1	-	140	153	68.1	62.8 (118)	-	-	10.1149/1.3258274	2010
1	LCO	Al2O3	P	TMA/H2O, 180C, RR	2	2.2	~0.3-0.4	83	?	Li	3.3-4.5	RT	1	1	-	140	149.4	132.7	131.6 (118)	-	-	10.1149/1.3258274	2010
1	LCO	Al2O3	P	TMA/H2O, 180C, RR	6	2.2	?	83	?	Li	3.3-4.5	RT	1	1	-	140	124.9	119.4	117.1 (118)	-	-	10.1149/1.3258274	2010
1	LCO	Al2O3	P	TMA/H2O, 180C, RR	8	2.2	?	83	?	Li	3.3-4.5	RT	1	1	-	140	66.9	?	?	-	-	10.1149/1.3258275	2010
1	LCO	Al2O3	P	TMA/H2O, 180C, RR	10	2.2	?	83	?	Li	3.3-4.5	RT	1	1	-	140	19.9	16.6	17.1 (118)	-	-	10.1149/1.3258274	2010
1	LCO	Al2O3	P	TMA/H2O, 180C, RR	4	2.2	?	83	?	Li	3.3-4.5	RT	1	1	-	140	152.9	136.3	-	-	-	10.1149/1.3258274	2010
2	LCO	-	-	-	-	-	-	80	2-3	Li	3.3-4.3	RT	?	?	-	?	?	?	?	500 mA/g	112.6	10.1039/C6RA10531A	2016
2	LCO	Al2O3	P	TMA/H2O, 180C, RR	2	?	?	80	2-3	Li	3.3-4.5	RT	1	1	-	140	173.2	?	176.8 (27)	-	-	10.1039/C6RA10531A	2016
2	LCO	Al2O3	P	TMA/H2O, 180C, RR	25	?	5	80	2-3	Li	3.3-4.3	RT	?	?	-	?	?	?	?	100 mA/g	10	10.1039/C6RA10531A	2016
2	LCO	Al2O3	P	TMA/H2O, 180C, RR	2	?	?	80	2-3	Li	3.3-4.7	RT	1	1	-	140	195	119.5	116.3 (107)	-	-	10.1039/C6RA10531A	2016
3	LCO	-	-	-	-	-	-	80	2	Li	3.0-4.5	RT	0.5	0.5	-	190	~175.3	~146.5	131 (200)	3	~159.8	10.1021/acsami.2c05129	2022
3	LCO	Al2O3	P	TMA/H2O, 150C	8	?	~1	80	2	Li	3.0-4.5	RT	0.5	0.5	-	190	184.9	~172	172 (200)	3	~165.3	10.1021/acsami.2c05129	2022
3	LCO	Al2O3	P	TMA/H2O, 150C	40	?	?	80	2	Li	3.0-4.5	RT	0.5	0.5	-	190	~150	~121.5	119 (200)	3	~123.1	10.1021/acsami.2c05129	2022
3	LCO	Al2O3	P	TMA/H2O, 150C	80	?	?	80	2	Li	3.0-4.5	RT	0.5	0.5	-	190	~140	~104.9	95 (200)	3	~113.6	10.1021/acsami.2c05129	2022
Spinel-type materials
4	LMO um	-	P	-	-	-	-	80	~5.3	Li	3.4-4.5	55	1	1	-	120	79.4	36.8	-	-	-	doi.org/10.1166/jnn.2012.6577	2012
4	LMO um	Al2O3	P	TMA/H2O, 120C	6	1.2	0.72	80	~5.3	Li	3.4-4.5	55	1	1	-	120	102.3	51.5	-	-	-	doi.org/10.1166/jnn.2012.6577	2012
4	LMO um	-	P	-	-	-	-	80	~5.3	Li	3.4-4.5	55	2	2	-	120	53.9	31.2	-	-	-	doi.org/10.1166/jnn.2012.6577	2012
4	LMO um	Al2O3	P	TMA/H2O, 120C	6	1.2	0.72	80	~5.3	Li	3.4-4.5	55	2	2	-	120	84.8	44	-	-	-	doi.org/10.1166/jnn.2012.6577	2012
4	LMO um	-	P	-	-	-	-	80	~5.3	Li	3.4-4.5	55	5	5	-	120	2.9	2.3	-	-	-	doi.org/10.1166/jnn.2012.6577	2012
4	LMO um	Al2O3	P	TMA/H2O, 120C	6	1.2	0.72	80	~5.3	Li	3.4-4.5	55	5	5	-	120	14.3	6.8	-	-	-	doi.org/10.1166/jnn.2012.6577	2012
4	LMO nm	-	P	-	-	-	-	80	~5.3	Li	3.4-4.5	55	1	1	-	120	138.4	107.9	-	-	-	doi.org/10.1166/jnn.2012.6577	2012
4	LMO nm	Al2O3	P	TMA/H2O, 120C	6	1.2	0.72	80	~5.3	Li	3.4-4.5	55	1	1	-	120	142.5	112	-	-	-	doi.org/10.1166/jnn.2012.6577	2012
4	LMO um	-	P	-	-	-	-	80	~5.3	Li	3.4-4.5	55	2	2	-	120	135.7	106.3	-	-	-	doi.org/10.1166/jnn.2012.6577	2012
4	LMO nm	Al2O3	P	TMA/H2O, 120C	412	1.2	50	80	~5.3	Li	3.4-4.5	55	2	2	-	120	135.1	110	-	-	-	doi.org/10.1166/jnn.2012.6577	2012
4	LMO nm	-	P	-	-	-	-	80	~5.3	Li	3.4-4.5	55	5	5	-	120	112.4	95.5	-	-	-	doi.org/10.1166/jnn.2012.6577	2012
4	LMO nm	Al2O3	P	TMA/H2O, 120C	6	1.2	0.72	80	~5.3	Li	3.4-4.5	55	5	5	-	120	124.7	106.7	-	-	-	doi.org/10.1166/jnn.2012.6577	2012
4	LMO nm	Al2O3	P	TMA/H2O, 120C	6	1.2	0.72	80	~5.3	Li	3.4-4.5	RT	2.5	2.5	-	120	101.5	96.5	-	-	-	doi.org/10.1166/jnn.2012.6577	2012
4	LMO nm	-	P	-	-	-	-	80	~5.3	Li	3.4-4.5	RT	2.5	2.5	-	120	?	78.6	-	-	-	doi.org/10.1166/jnn.2012.6577	2012
4	LMO nm	Al2O3	P	TMA/H2O, 120C	4	1.2	0.72	80	~5.3	Li	3.4-4.5	RT	2.5	2.5	-	120	?	85.6	-	-	-	doi.org/10.1166/jnn.2012.6577	2012
5	LMO	-	P	-		-		80	cathode mass~20 mg/?	Li	3.4-4.5	RT	2.5	2.5	-	120	100.6	78.6	-	-	-	10.1007/s11581-012-0717-9	2013
5	LMO	Al2O3	P	TMA/H2O, 120C	4	1.5	0.6	80	~20 mg/?	Li	3.4-4.5	RT	2.5	2.5	-	120	~105.8	85.6	-	-	-	10.1007/s11581-012-0717-9	2013
5	LMO	Al2O3	P	TMA/H2O, 120C	6	1.5	0.9	80	~20 mg/?	Li	3.4-4.5	RT	2.5	2.5	-	120	101.5	96.5	-	-	-	10.1007/s11581-012-0717-9	2013
5	LMO	Al2O3	P	TMA/H2O, 120C	8	1.5	1.2	80	~20 mg/?	Li	3.4-4.5	RT	2.5	2.5	-	120	~75	81.5	-	-	-	10.1007/s11581-012-0717-9	2013
6	LMO	-	-	-	-	-	-	90	5	Li	3-4.3	RT	1	1	-	148	119	-	~113 (50)	-	-	doi.org/10.1002/celc.202001496	2021
6	LMO	Al2O3	P	TMA/H2O, 120C	5	?	0.19	90	5	Li	3-4.3	RT	1	1	-	148	110	-	~101 (50)	-	-	doi.org/10.1002/celc.202001496	2021
6	LMO	-	-	-	-	-	-	90	5	LFP	0.2-0.9	RT	1	1	-	148	115	-	~92 (50)	-	-	doi.org/10.1002/celc.202001496	2021
6	LMO	Al2O3	P	TMA/H2O, 120C	5	?	0.19	90	5	LFP	0.2-0.9	RT	1	1	-	148	118	-	~102.66 (50)	-	-	doi.org/10.1002/celc.202001496	2021
6	LMO	Al2O3	P	TMA/H2O, 120C	10	?	0.31	90	5	LFP	0.2-0.9	RT	1	1	-	148	108	-	~85.32 (50)	-	-	doi.org/10.1002/celc.202001496	2021
6	LMO	-	-	-	-	-	-	90	5	LFP	0.2-0.9	RT	1	1	-	148	118	-	~102.66 (50)	-	-	doi.org/10.1002/celc.202001496	2021
6	LMO	Al2O3	P	TMA/H2O, 120C	5	?	0.19	90	5	LFP	0.2-0.9	RT	1	1	-	148	120	-	~97.2 (50)	-	-	doi.org/10.1002/celc.202001496	2021
7	LMO	-	-	-	-	-	-	-	-	-	-	RT	-	-	-	-	-	-	-	2	~41.3	10.1016/j.apsusc.2022.153329	2022
7	LMO	Al2O3	P	TMA/H2O, 200C	1	1.1	0.11	-	-	-	-	RT	-	-	-	-	-	-	-	2	~42.1	10.1016/j.apsusc.2022.153329	2022
7	LMO	Al2O3	P	TDMAA/H2O, 200C	1	1.08	0.108	-	-	-	-	RT	-	-	-	-	-	-	-	2	~45.9	10.1016/j.apsusc.2022.153329	2022
7	LMO	Al2O3	P	AlCl3/H2O, 200C	1	1.17	0.117	-	-	-	-	RT	-	-	-	-	-	-	-	2	~41.2	10.1016/j.apsusc.2022.153329	2022
7	LMO	Al2O3	P	DMAI/H2O, 200C	1	1.06	0.106	-	-	-	-	RT	-	-	-	-	-	-	-	2	~50.5	10.1016/j.apsusc.2022.153329	2022
7	LMO	Al2O3	P	ATIP/H2O, 200C	1	1.02	0.102	-	-	-	-	RT	-	-	-	-	-	-	-	2	~43.7	10.1016/j.apsusc.2022.153329	2022
8	LMO	-	-	-	-	-	-	80	~3.5	Li	3.4-4.5	25	1	1	-	120	65.7	32.4	-	-	-	10.1007/s10008-012-1962-6	2012
8	LMO	Al2O3	P	TMA/H2O, 120C	6	1.12	0.672	80	~3.5	Li	3.4-4.5	25	1	1	-	120	60	32.5	-	-	-	10.1007/s10008-012-1962-6	2012
8	LMO	-	-	-	-	-	-	80	~3.5	Li	3.4-4.5	55	1	1	-	120	52.9	27	-	-	-	10.1007/s10008-012-1962-6	2012
8	LMO	Al2O3	P	TMA/H2O, 120C	6	1.12	0.672	80	~3.5	Li	3.4-4.5	55	1	1	-	120	89.1	45.8	-	-	-	10.1007/s10008-012-1962-6	2012
9	LMO	-	-	-	-	-	-	80	?	Li	3.4-4.5	25	1	1	-	?	61	~39.4	24 (1000)	2	19.5	10.1002/admi.201500046	2015
9	LMO	-	-	-	-	-	-	80	?	Li	3.4-4.5	55	1	1	-	?	~53.3	~38	~16.1 (1000)	2	17.7	10.1002/admi.201500046	2015
9	LMO	Al2O3	P	TMA/H2O, 250C, FBR	5	?	?	80	?	Li	3.4-4.5	25	1	1	-	?	54	~50.7	~36.1 (1000)	2	33.2	10.1002/admi.201500046	2015
9	LMO	Al2O3	P	TMA/H2O, 250C, FBR	5	?	?	80	?	Li	3.4-4.5	55	1	1	-	?	~46.2	~42.7	29 (1000)	2	24.4	10.1002/admi.201500046	2015
10	LMO	-	-	-	-	-	-	80	?	Li	3.4-4.5	25	1	1	-	148	~60	~56	~47 (500)	-	-	10.1002/adts.202000002	2020
10	LMO	-	-	-	-	-	-	80	?	Li	3.4-4.5	55	1	1	-	148	~53.7	~48.8	~35.8 (500)	-	-	10.1002/adts.202000002	2020
10	LMO	Al2O3	P	TMA/H2O, 177C, FBR	5	?	~0.75	80	?	Li	3.4-4.5	25	1	1	-	148	~54.6	~50.6	~42.6 (500)	-	-	10.1002/adts.202000002	2020
10	LMO	Al2O3	P	TMA/H2O, 177C, FBR	5	?	~0.75	80	?	Li	3.4-4.5	55	1	1	-	148	~48.6	~42.7	~34.1 (500)	-	-	10.1002/adts.202000002	2020
11	LNMO	-	-	-	-	-	-	90	~5.5	Li	3.0-5.0	30	0.5	0.5	-	140	~121	~114.6	~113.9 (150)	10	0	10.1016/j.jpowsour.2014.10.207	2015
11	LNMO	Al2O3	P	TMA/H2O, 180C	2	2	0.4	90	~5.5	Li	3.0-5.0	30	0.5	0.5	-	140	111.8	~101.7	~99.5 (150)	-	-	10.1016/j.jpowsour.2014.10.207	2015
11	LNMO	Al2O3	P	TMA/H2O, 180C	4	2	0.8	90	~5.5	Li	3.0-5.0	30	0.5	0.5	-	140	~97.4	~106.1	~105.8 (150)	10	0	10.1016/j.jpowsour.2014.10.207	2015
11	LNMO	Al2O3	P	TMA/H2O, 180C	6	2	1.2	90	~5.5	Li	3.0-5.0	30	0.5	0.5	-	140	~47.6	~78.3	~81 (150)	-	-	10.1016/j.jpowsour.2014.10.207	2015
11	LNMO	Al2O3	P	TMA/H2O, 180C	10	2	2	90	~5.5	Li	3.0-5.0	30	0.5	0.5	-	140	~1.3	~6.3	~9.8 (150)	-	-	10.1016/j.jpowsour.2014.10.207	2015
11	LNMO	-	-	-	-	-	-	90	~5.6	LFP	2.0-3.45	30	0.5	0.5	-	140	~135	~111.1	~98.8 (200)	-	-	10.1016/j.jpowsour.2014.10.207	2015
11	LNMO	Al2O3	P	TMA/H2O, 180C	4	2	0.8	90	~5.5	LFP	2.0-3.45	30	0.5	0.5	-	140	~114.3	~118.2	~109.3 (200)	-	-	10.1016/j.jpowsour.2014.10.207	2015
12	LNMO	-	-	-	-	-	-	-	-	-	3.0-5.0	-	-	-	-	-	-	-	-	-	-	10.1016/j.electacta.2015.10.041	2015
12	LNMO	Al2O3	P	TMA/H2O, 225C, vibrations	5	-	-	-	-	-	-	-	-	-	-	-	-	-	-	-	-	10.1016/j.electacta.2015.10.041	2015
13	LNMO	-	-	-	-	-	-	90	5	Li	3.6-4.9	20	0.5	0.5	-	140	~122.8	~118	~93.3 (150)	-	-	10.1021/acsomega.1c04457	2021
13	LNMO	-	-	-	-	-	-	90	5	Li	3.6-4.9	50	0.5	0.5	-	140	~119.2	~88.9	~38.6 (135)	-	-	10.1021/acsomega.1c04457	2021
13	LNMO	Al2O3	P	TMA/H2O, 120C	5	?	0.6	90	5	Li	3.6-4.9	20	0.5	0.5	-	140	~110.8	~119.5	~117.8 (150)	-	-	10.1021/acsomega.1c04457	2021
13	LNMO	Al2O3	P	TMA/H2O, 120C	5	?	0.6	90	5	Li	3.6-4.9	50	0.5	0.5	-	140	~123.6	~57.1	~24.9 (150)	-	-	10.1021/acsomega.1c04457	2021
13	LNMO	Al2O3	P	TMA/H2O, 120C	10	?	1	90	5	Li	3.6-4.9	20	0.5	0.5	-	140	~60.1	~82.7	~40.1 (150)	-	-	10.1021/acsomega.1c04457	2021
13	LNMO	Al2O3	P	TMA/H2O, 120C	10	?	1	90	5	Li	3.6-4.9	50	0.5	0.5	-	140	~105.4	~69.3	~52.6 (135)	-	-	10.1021/acsomega.1c04457	2021
13	LNMO	Al2O3	P	TMA/H2O, 120C	20	?	1.7	90	5	Li	3.6-4.9	20	0.5	0.5	-	140	~15.9	~29.6	~33.4 (150)	-	-	10.1021/acsomega.1c04457	2021
13	LNMO	Al2O3	P	TMA/H2O, 120C	20	?	1.7	90	5	Li	3.6-4.9	50	0.5	0.5	-	140	~73.4	~76.9	~29 (150)	-	-	10.1021/acsomega.1c04457	2021
14	LNMO	-	-	-	-	-	-	83	?	Li	3.5-4.9	55	0.5	0.5	-	?	~114.3	~107.3	~101.7 (150)	5	89.6	10.1007/s10008-021-05047-0	2021
14	LNMO	Al2O3	P	TMA/H2O, 180C	1	?	~2	83	?	Li	3.5-4.9	55	0.5	0.5	-	?	~117.8	~113.5	~110.2 (150)	5	88.8	10.1007/s10008-021-05047-0	2021
14	LNMO	Al2O3	P	TMA/H2O, 180C	3	?	?	83	?	Li	3.5-4.9	55	0.5	0.5	-	?	~113.4	~104.5	~97.8 (150)	5	89.5	10.1007/s10008-021-05047-0	2021
14	LNMO	Al2O3	P	TMA/H2O, 180C	5	?	~8.5	83	?	Li	3.5-4.9	55	0.5	0.5	-	?	~115	~91.1	~85 (150)	5	83.1	10.1007/s10008-021-05047-0	2021
15	LNMO nm	-	-	-	-	-	-	-	0.81 mg/?	Li	3.5-4.85	RT	1	7.5	-	?	101.12	-	-	2	0	10.1021/acsami.5b01392	2015
15	LNMO nm	Al2O3	P	TMA/H2O, 250C	5	0.816	~0.41	-	0.81 mg/?	Li	3.5-4.85	RT	1	7.5	-	?	105.72	-	-	2	~78.7	10.1021/acsami.5b01392	2015
15	LNMO nm	Al2O3	P	TMA/H2O, 250C	10	0.816	~0.82	-	0.81 mg/?	Li	3.5-4.85	RT	1	7.5	-	?	-	-	-	2	-	10.1021/acsami.5b01392	2015
15	LNMO nm	Al2O3	P	TMA/H2O, 250C	30	0.816	~2.47	-	0.81 mg/?	Li	3.5-4.85	RT	1	7.5	-	?	-	-	-	2	-	10.1021/acsami.5b01392	2015
N-rich NMC and NCA
16	NMC111	-	-	-	-	-	-	83	?	?	3.0-4.5	RT	1,25	1,25	-	160	152	104	89(119)	2,5	121	10.1016/j.jpowsour.2010.11.124	2011
16	NMC111	Al2O3	P	TMA/H2O, rotary	2	2	?	83	?	?	3.0-4.5	RT	1,25	1,25	-	160	153	139	137(119)	-	-	10.1016/j.jpowsour.2010.11.124	2011
16	NMC111	Al2O3	P	TMA/H2O, rotary	4	2	?	83	?	?	3.0-4.5	RT	1,25	1,25	-	160	141	128	123(119)	2,5	103	10.1016/j.jpowsour.2010.11.124	2011
16	NMC111	Al2O3	P	TMA/H2O, rotary	6	2	?	83	?	?	3.0-4.5	RT	1,25	1,25	-	160	135	115	115(119)	-	-	10.1016/j.jpowsour.2010.11.124	2011
16	NMC111	Al2O3	P	TMA/H2O, rotary	10	2	?	83	?	?	3.0-4.5	RT	1,25	1,25	-	160	126	54	43(119)	-	-	10.1016/j.jpowsour.2010.11.124	2011
17	NMC111	-	-	-	-	-	-	80	3	Li	2.0-4.7	RT	1	1	-	200	50	4	1,5(500)	-	-	10.1021/acsanm.9b01490	2019
17	NMC111	Al2O3	P	TMA/H2O, 120C, vibrating FBR	2	?	?	80	3	Li	2.0-4.7	RT	1	1	-	200	55	51	16(500)	-	-	10.1021/acsanm.9b01490	2019
17	NMC111	Al2O3	P	TMA/H2O, 120C, vibrating FBR	4	?	?	80	3	Li	2.0-4.7	RT	1	1	-	200	38	37	34(500)	-	-	10.1021/acsanm.9b01490	2019
17	NMC111	Al2O3	P	TMA/H2O, 120C, vibrating FBR	15	?	3--3.2	80	3	Li	2.0-4.7	RT	1	1	-	200	1	0	0(500)	-	-	10.1021/acsanm.9b01490	2019
18	NMC442	-	-	-	-	-	-	94	2--3	Li	3.0-4.2	RT	5	5	-	170	130	124	120(500)	-	-	10.1021/acs.chemmater.5b02952	2015
18	NMC442	Al2O3	P	TMA/H2O	4	1.1--1.5	0,6	94	2--3	Li	3.0-4.2	RT	5	5	-	170	124	120	116(500)	-	-	10.1021/acs.chemmater.5b02952	2015
18	NMC442	-	-	-	-	-	-	94	2--3	Li	3.0-4.2	RT	10	10	-	170	112	110	103(497)	-	-	10.1021/acs.chemmater.5b02952	2015
18	NMC442	Al2O3	P	TMA/H2O	4	1.1--1.5	0,6	94	2--3	Li	3.0-4.2	RT	10	10	-	170	109	100	92(497)	-	-	10.1021/acs.chemmater.5b02952	2015
18	NMC442	-	-	-	-	-	-	94	2--3	Li	2.5-4.5	RT	0,5	0,5	-	170	210	-	190(20)	5	81	10.1021/acs.chemmater.5b02952	2015
18	NMC442	Al2O3	P	TMA/H2O	4	1.1--1.5	0,6	94	2--3	Li	2.5-4.5	RT	0,5	0,5	-	170	163	-	154(20)	5	106	10.1021/acs.chemmater.5b02952	2015
18	NMC442	-	-	-	-	-	-	94	2--3	Li	2.5-4.5	RT	0,5	0,5	-	170	160	-	159(20)	5	92	10.1021/acs.chemmater.5b02952	2015
18	NMC442	Al2O3	P	TMA/H2O	4	1.1--1.5	0,6	94	2--3	Li	2.5-4.5	RT	0,5	0,5	-	170	190	-	186(20)	5	161	10.1021/acs.chemmater.5b02952	2015
19	NMC532	-	-	-	-	-	-	?	15	Li	3.0-4.3	RT	0.33	1	+	138	156	128	110(178)	0.1C-10D	40	10.1021/acsami.6b16562	2017
19	NMC532	Al2O3	P	TMA/H2O, 200C	5	1,2	?	?	15	Li	3.0-4.3	RT	0.33	1	+	138	136	148	144(178)	0.1C-10D	52	10.1021/acsami.6b16562	2017
19	NMC532	-	-	-	-	-	-	?	15	Li	2.0-4.3	RT	0.33	1	+	138	156	128	117(148)	0.1C-10D	40	10.1021/acsami.5b11878	2016
19	NMC532	Al2O3	P	TMA/(H2O+O3), 200C	5	0.9-1.1	?	?	15	Li	2.0-4.3	RT	0.33	1	+	138	136	148	145(148)	0.1C-10D	52	10.1021/acsami.5b11878	2016
20	NMC532	-	-	-	-	-	-	80	4	Li	3.0-4.55	RT	1	1	+	185	178	23	17(200)	10	1	10.1016/j.apsusc.2022.155162	2023
20	NMC532	Al2O3	P	TMA/H2O, 180C	4	1	0,4	80	4	Li	3.0-4.55	RT	1	1	+	185	182	150	120(200)	10	31	10.1016/j.apsusc.2022.155162	2023
20	NMC532	-	-	-	-	-	-	80	4	Li	3.0-4.5	RT	0,5	0,5	+	185	175	154	52(286)	-	-	10.1016/j.apsusc.2022.155162	2023
20	NMC532	Al2O3	P	TMA/H2O, 180C	4	1	0,4	80	4	Li	3.0-4.5	RT	0,5	0,5	+	185	187	180	137(500)	-	-	10.1016/j.apsusc.2022.155162	2023
21	NMC532	-	-	-	-	-	-	92	?	Li	3.0-4.3	RT	0.33	1	-	?	150	132	109(197)	-	-	10.1016/j.jpowsour.2017.09.050	2018
21	NMC532	Al2O3	P	TMA/H2O, 200C	?	?	?	92	?	Li	3.0-4.3	RT	0.33	1	-	?	124	135	131(197)	-	-	10.1016/j.jpowsour.2017.09.050	2018
22	NMC532	-	-	-	-	-	-	90	?	Li	3.0-4.5	RT	0,333	0,333	+	?	184	-	147(80)	-	-	10.1149/2.0681915jes	2019
22	NMC532	Al2O3	P	TMA/H2O, 180C	2	?	?	90	?	Li	3.0-4.5	RT	0,333	0,333	+	?	176	-	162(80)	-	-	10.1149/2.0681915jes	2019
22	NMC532	Al2O3	P	TMA/H2O, 180C	8	?	?	90	?	Li	3.0-4.5	RT	0,333	0,333	+	?	162	-	147(80)	-	-	10.1149/2.0681915jes	2019
23	NMC532	-	-	-	-	-	-	66	?	Li	3.0-4.3	RT	5	5	-	138	144	71	-	-	-	10.1016/j.jpowsour.2017.08.076	2017
23	NMC532	Al2O3	P	TMA/H2O, 100C	5	1	?	66	?	Li	3.0-4.3	RT	5	5	-	138	140	85	-	-	-	10.1016/j.jpowsour.2017.08.076	2017
23	NMC532	-	-	-	-	-	-	66	?	Li	3.0-4.3	RT	0,2	0,2	-	138	176	161	-	-	-	10.1016/j.jpowsour.2017.08.076	2017
23	NMC532	Al2O3	P	TMA/H2O, 100C	5	1	?	66	?	Li	3.0-4.3	RT	0,2	0,2	-	138	169	156	-	-	-	10.1016/j.jpowsour.2017.08.076	2017
24	NMC622	-	-	-	-	-	-	80	2.6-3.4	Li	3.0-4.5	RT	1	1	-	180	140	94	49(300)	2	135	10.3390/coatings12010084	2022
24	NMC622	Al2O3	P	TMA/H2O, 150C, FBR	2	1,3	?	80	2.6-3.4	Li	3.0-4.5	RT	1	1	-	180	129	118	111(300)	2	121	10.3390/coatings12010084	2022
24	NMC622	Al2O3	P	TMA/H2O, 150C, FBR	4	1,3	?	80	2.6-3.4	Li	3.0-4.5	RT	-	-	-	180	-	-	-	2	83	10.3390/coatings12010084	2022
24	NMC622	Al2O3	P	TMA/H2O, 150C, FBR	8	1,3	?	80	2.6-3.4	Li	3.0-4.5	RT	-	-	-	180	-	-	-	2	23	10.3390/coatings12010084	2022
25	NMC0.68-0.22-0.1	-	-	-	-	-	-	80	?	Li	2.7-4.4	25	1	1	-	200	173	167	160(178)	20	86	10.1016/j.matlet.2020.127771	2020
25	NMC0.68-0.22-0.1	Al2O3	P	TMA/?, 180C	?	?	1	80	?	Li	2.7-4.4	25	1	1	-	200	177	171	160(229)	20	106	10.1016/j.matlet.2020.127771	2020
25	NMC0.68-0.22-0.1	-	-	-	-	-	-	80	?	Li	2.7-4.4	60	1	1	-	200	190	-	160(80)	20	140	10.1016/j.matlet.2020.127771	2020
25	NMC0.68-0.22-0.1	Al2O3	P	TMA/?, 180C	?	?	1	80	?	Li	2.7-4.4	60	1	1	-	200	196	177	160(150)	20	149	10.1016/j.matlet.2020.127771	2020
25	NMC0.68-0.22-0.1	-	-	-	-	-	-	80	?	Li	2.7-4.8	25	1	1	-	200	181	-	160(75)	20	88	10.1016/j.matlet.2020.127771	2020
25	NMC0.68-0.22-0.1	Al2O3	P	TMA/?, 180C	?	?	1	80	?	Li	2.7-4.8	25	1	1	-	200	200	170	160(142)	20	134	10.1016/j.matlet.2020.127771	2020
26	NMC811	-	-	-	-	-	-	71.429	?	Li	2.8-4.3	RT	1	1	-	180	174	101	-	3	113	doi.org/10.33961/jecst.2020.01599	2021
26	NMC811	-	-	-	-	-	-	71.429	?	Li	2.8-4.3	RT	2	2	-	180	152	93	-	-	-	doi.org/10.33961/jecst.2020.01599	2021
26	NMC811	Al2O3	P	TMA/H2O, 100C	10	?	3.4	71.429	?	Li	2.8-4.3	RT	1	1	-	180	177	128	-	3	140	doi.org/10.33961/jecst.2020.01599	2021
26	NMC811	Al2O3	P	TMA/H2O, 100C	10	?	3.4	71.429	?	Li	2.8-4.3	RT	2	2	-	180	158	113	-	-	-	doi.org/10.33961/jecst.2020.01599	2021
27	NMC811	-	-	-	-	-	-	80	3095	Li	2.7-4.6	RT	0,1	0,1	-	200	199	128	-	0,1	199	10.3390/coatings9020092	2019
27	NMC811	Al2O3	P	TMA/H2O, 100C	10	1,12	1,12	80	3095	Li	2.7-4.6	RT	0,1	0,1	-	200	205	135	-	0,1	205	10.3390/coatings9020092	2019
27	NMC811	Al2O3	P	TMA/H2O, 100C	20	1,12	2,24	80	3095	Li	2.7-4.6	RT	0,1	0,1	-	200	213	157	-	0,1	213	10.3390/coatings9020092	2019
27	NMC811	Al2O3	P	TMA/H2O, 100C	50	1,12	5,6	80	3095	Li	2.7-4.6	RT	0,1	0,1	-	200	180	123	-	0,1	180	10.3390/coatings9020092	2019
28	NMC811	-	-	-	-	-	-	85	?	Li	3.0-4.2	30	0,1	0,1	-	170	149	112	-	5	96	10.1039/d2ta07322f	2022
28	NMC811	Al2O3	P	TMA/H2O, 100C	?	1,1	3,33	85	?	Li	3.0-4.2	30	0,1	0,1	-	170	139	85	-	5	90	10.1039/d2ta07322f	2022
29	NMC811	-	-	-	-	-	-	80	?	Li	2.5-4.3	RT	0,5	0,5	-	200	134	80	68 (198)	0,5	134	10.1149/1945-7111/ac6c56	2022
29	NMC811	Al2O3	P	TMA/H2O, 150C, FBR	2	?	?	80	?	Li	2.5-4.3	RT	0,5	0,5	-	200	155	118	105 (198)	0,5	155	10.1149/1945-7111/ac6c56	2022
29	NMC811	Al2O3	P	TMA/H2O, 150C, FBR	5	?	?	80	?	Li	2.5-4.3	RT	0,5	0,5	-	200	157	109	90 (198)	0,5	157	10.1149/1945-7111/ac6c56	2022
29	NMC811	Al2O3	P	TMA/H2O, 150C, FBR	10	?	?	80	?	Li	2.5-4.3	RT	0,5	0,5	-	200	161	109	91 (198)	0,5	161	10.1149/1945-7111/ac6c56	2022
29	NMC811	-	-	-	-	-	-	80	?	Li	2.5-4.5	RT	0,5	0,5	-	200	140	83	75 (198)	0,5	140	10.1149/1945-7111/ac6c56	2022
29	NMC811	Al2O3	P	TMA/H2O, 150C, FBR	2	?	?	80	?	Li	2.5-4.5	RT	0,5	0,5	-	200	161	116	99 (198)	0,5	161	10.1149/1945-7111/ac6c56	2022
29	NMC811	Al2O3	P	TMA/H2O, 150C, FBR	5	?	?	80	?	Li	2.5-4.5	RT	0,5	0,5	-	200	172	124	105 (198)	0,5	172	10.1149/1945-7111/ac6c56	2022
29	NMC811	Al2O3	P	TMA/H2O, 150C, FBR	10	?	?	80	?	Li	2.5-4.5	RT	0,5	0,5	-	200	179	136	118 (198)	0,5	179	10.1149/1945-7111/ac6c56	2022
30	NMC811 (FCG)	-	-	-	-	-	-	92	15	Li	3.0-4.8	RT	0,05	0,05	-	180	234	-	231 (2)	0.05C-1D	164	10.1021/acsaem.8b01877	2019
30	NMC811 (FCG)	Al2O3	P	TMA/H2O, FBR	?	?	10	92	15	Li	3.0-4.8	RT	0,05	0,05	-	180	235	-	233 (2)	0.05C-1D	180	10.1021/acsaem.8b01877	2019
30	NMC811	-	-	-	-	-	-	80	?	Li	2.5-4.25	25	0,5	0,5	-	?	166	120	-	10	134	10.1109/ITEC-AP.2016.7513031	2016
30	NMC811	Al2O3	P	TMA/plasma-O2, 70C, RPALD	?	?	3	80	?	Li	2.5-4.25	25	0,5	0,5	-	?	182	155	-	10	136	10.1109/ITEC-AP.2016.7513031	2016
30	NMC811	Al2O3	P	TMA/plasma-O2, 70C, RPALD	?	?	10	80	?	Li	2.5-4.25	25	0,5	0,5	-	?	66	95	-	10	83	10.1109/ITEC-AP.2016.7513031	2016
30	NMC811	-	-	-	-	-	-	80	?	Li	2.5-4.25	55	0,5	0,5	-	?	129	-	93(50)	-	-	10.1109/ITEC-AP.2016.7513031	2016
30	NMC811	Al2O3	P	TMA/plasma-O2, 70C, RPALD	?	?	3	80	?	Li	2.5-4.25	55	0,5	0,5	-	?	170	-	132(50)	-	-	10.1109/ITEC-AP.2016.7513031	2016
30	NMC811	Al2O3	P	TMA/plasma-O2, 70C, RPALD	?	?	10	80	?	Li	2.5-4.25	55	0,5	0,5	-	?	131	-	95(50)	-	-	10.1109/ITEC-AP.2016.7513031	2016
31	NMC811 (FCG)	-	-	-	-	-	-	92	15	Graphite	3.0-4.35	RT	0.3	0.3	-	?	160	154	128 (800)	5	34	10.1038/srep26532	2016
31	NMC811 (FCG)	-	-	-	-	-	-	92	15	Graphite	3.0-4.35	RT	1	1	-	?	150	140	119 (532)	-	-	10.1038/srep26532	2016
31	NMC811 (FCG)	Al2O3	P	TMA/H2O, FBR	?	?	10	92	15	Graphite	3.0-4.35	RT	0.3	0.3	-	?	160	153	130 (961)	5	30	10.1038/srep26532	2016
31	NMC811 (FCG)	Al2O3	P	TMA/H2O, FBR	?	?	10	92	15	Graphite	3.0-4.35	RT	1	1	-	?	149	143	119 (740)	-	-	10.1038/srep26532	2016
32	NMC811	-	-	-	-	-	-	80	~3.5	Li	2.5−4.5	RT	0.5	0.5	-	200	206	~141.2	~105.3 (200)	5	0	10.1021/acsaem.0c01420	2020
32	NMC811	Al2O3	P	TMA/H2O, 177C, FBR	4	?	?	80	~3.5	Li	2.5−4.5	RT	0.5	0.5	-	200	~198	~164.3	~153.1 (158)	-	-	10.1021/acsaem.0c01420	2020
33	NMC0.83-0.05-0.12	-	-	-	-	-	-	?	?	?	2.8-4.3	RT	0,1	0,1	-	200	199	177	-	2	189	10.1149/1945-7111/abf17d	2021
33	NMC0.83-0.05-0.12	Al2O3	P	TMA/H2O, 150C, FBR	?	?	1	?	?	?	2.8-4.3	RT	0,1	0,1	-	200	201	181	-	2	191	10.1149/1945-7111/abf17d	2021
33	NMC0.83-0.05-0.12	-	-	-	-	-	-	?	?	?	2.7-4.2	RT	0,1	0,1	-	200	190	181	165(245)	-	-	10.1149/1945-7111/abf17d	2021
33	NMC0.83-0.05-0.12	Al2O3	P	TMA/H2O, 150C, FBR	?	?	1	?	?	?	2.7-4.2	RT	0,1	0,1	-	200	193	183	173(245)	-	-	10.1149/1945-7111/abf17d	2021
34	NCA0.79-0.16-0.05	-	-	-	-	-	-	92	15	Graphite	3.0-4.4	RT	0.3	0.3	-	?	147	137	93 (300)	5	47	10.1038/srep26532	2016
34	NCA0.79-0.16-0.05	-	-	-	-	-	-	92	15	Graphite	3.0-4.4	RT	1	1	-	?	118	105	77 (300)	-	-	10.1038/srep26532	2016
34	NCA0.79-0.16-0.05	Al2O3	P	TMA/H2O, FBR	?	?	10	92	15	Graphite	3.0-4.4	RT	0.3	0.3	-	?	150	136	82 (300)	5	12	10.1038/srep26532	2016
34	NCA0.79-0.16-0.05	Al2O3	P	TMA/H2O, FBR	?	?	10	92	15	Graphite	3.0-4.4	RT	1	1	-	?	143	118	85 (300)	-	-	10.1038/srep26532	2016
LLO
35	Li1.08Ni0.22Co0.22Mn0.45O2	-	-	-	-	-	-	80	4	Li	2.0-4.6	RT	1	1	-	250	186	167	159(200)	3	153	10.1002/adfm.202302236	2023
35	Li1.08Ni0.22Co0.22Mn0.45O2	Al2O3	P	TMA/H2O, 180C, rotary	?	?	?	80	4	Li	2.0-4.6	RT	1	1	-	250	176	170	164(200)	3	145	10.1002/adfm.202302236	2023
36	Li1.13Mn0.54Ni0.13Co0.14O2	-	-	-	-	-	-	80	3	Li	2.0-4.8	RT	1	1	-	250	165	30	19(250)	-	-	10.1021/acsanm.9b01490	2019
36	Li1.13Mn0.54Ni0.13Co0.14O2	Al2O3	P	TMA/H2O, 120C, vibrating FBR	2	?	?	80	3	Li	2.0-4.8	RT	1	1	-	250	165	153	22(250)	-	-	10.1021/acsanm.9b01490	2019
36	Li1.13Mn0.54Ni0.13Co0.14O2	Al2O3	P	TMA/H2O, 120C, vibrating FBR	4	?	?	80	3	Li	2.0-4.8	RT	1	1	-	250	150	143	27(250)	-	-	10.1021/acsanm.9b01490	2019
36	Li1.13Mn0.54Ni0.13Co0.14O2	Al2O3	P	TMA/H2O, 120C, vibrating FBR	6	?	?	80	3	Li	2.0-4.8	RT	1	1	-	250	102	105	89(250)	-	-	10.1021/acsanm.9b01490	2019
36	Li1.13Mn0.54Ni0.13Co0.14O2	Al2O3	P	TMA/H2O, 120C, vibrating FBR	8	?	?	80	3	Li	2.0-4.8	RT	1	1	-	250	57	63	55(250)	-	-	10.1021/acsanm.9b01490	2019
36	Li1.13Mn0.54Ni0.13Co0.14O2	Al2O3	P	TMA/H2O, 120C, vibrating FBR	10	?	?	80	3	Li	2.0-4.8	RT	1	1	-	250	25	28	25(250)	-	-	10.1021/acsanm.9b01490	2019
37	Li1.2Mn0.54Co0.13Ni0.13O2	-	-	-	-	-	-	75	?	Li	2.0-4.8	RT	0,1	0,1	-	250	240	-	192(30)	-	-	10.1149/2.030112jes	2011
37	Li1.2Mn0.54Co0.13Ni0.13O2	Al2O3	P	TMA/H2O, 180C	2	?	?	75	?	Li	2.0-4.8	RT	0,1	0,1	-	250	230	-	207(30)	-	-	10.1149/2.030112jes	2011
37	Li1.2Mn0.54Co0.13Ni0.13O2	Al2O3	P	TMA/H2O, 180C	6	?	?	75	?	Li	2.0-4.8	RT	0,1	0,1	-	250	227	-	202(30)	-	-	10.1149/2.030112jes	2011
37	Li1.2Mn0.54Co0.13Ni0.13O2	Al2O3	P	TMA/H2O, 180C	20	?	?	75	?	Li	2.0-4.8	RT	0,1	0,1	-	250	213	-	201(30)	-	-	10.1149/2.030112jes	2011
38	Li1.2Ni0.2Mn0.6O2	-	-	-	-	-	-	80	?	Li	2.0-4.7	RT	0,1	0,1	-	200	266	-	230(40)	-	-	10.1021/acs.chemmater.5b04301	2016
38	Li1.2Ni0.2Mn0.6O2	Al2O3	P	TMA/H2O, 150C	4	?	3	80	?	Li	2.0-4.7	RT	0,1	0,1	-	200	241	-	252(40)	-	-	10.1021/acs.chemmater.5b04301	2016
39	Li1.2Ni0.2Mn0.6O2	-	-	-	-	-	-	80	3,1-3,3	Li	2.0-4.7	RT	0,1	0,1	-	200	245	-	208(98)	-	-	10.1016/j.ssi.2013.09.052	2014
39	Li1.2Ni0.2Mn0.6O2	Al2O3	P	TMA/H2O,?	4	?	1	80	3,1-3,3	Li	2.0-4.7	RT	0,1	0,1	-	200	252	-	235(98)	-	-	10.1016/j.ssi.2013.09.052	2014
40	Li1.2Ni0.16Mn0.54Co0.08O2	-	-	-	-	-	-	80	2,2-3,1	Li	2.0-4.6	RT	0,2	0,2	-	274	172	153	-	2	105	10.20964/2020.11.62	2020
40	Li1.2Ni0.16Mn0.54Co0.08O2	Al2O3	P	TMA/H2O, ?	?	?	?	80	2,2-3,1	Li	2.0-4.6	RT	0,2	0,2	-	274	193	180	-	2	151	10.20964/2020.11.62	2020
40	Li1.2Ni0.16Mn0.54Co0.08O2	-	-	-	-	-	-	80	2,2-3,1	Li	2.0-4.6	RT	1	1	-	274	172	87	-	-	-	10.20964/2020.11.62	2020
40	Li1.2Ni0.16Mn0.54Co0.08O2	Al2O3	P	TMA/H2O, ?	?	?	?	80	2,2-3,1	Li	2.0-4.6	RT	1	1	-	274	193	139	-	-	-	10.20964/2020.11.62	2020
41	Li1.2Mn0.55Ni0.15Co0.1O2	-	-	-	-	-	-	87	2.6--5.4	Li	2.0-4.8	RT	0,05	0,05	-	240	236	-	138(20)	-	-	10.1021/acsami.8b09550	2018
41	Li1.2Mn0.55Ni0.15Co0.1O2	Al2O3	P	TMA/H2O, 130C, non-shaking	13	?	2--3	87	2.6--5.4	Li	2.0-4.8	RT	0,05	0,05	-	240	252	-	160(20)	-	-	10.1021/acsami.8b09550	2018
41	Li1.2Mn0.55Ni0.15Co0.1O2	Al2O3	P	TMA/H2O, 250C, shaking	15	?	2--3	87	2.6--5.4	Li	2.0-4.8	RT	0,05	0,05	-	240	166	-	107(20)	-	-	10.1021/acsami.8b09550	2018
41	Li1.2Mn0.55Ni0.15Co0.1O2	-	-	-	-	-	-	87	2.6--5.4	Graphite	2.0-4.7	RT	0,1	0,1	-	240	230	40	-	-	-	10.1021/acsami.8b09550	2018
41	Li1.2Mn0.55Ni0.15Co0.1O2	Al2O3	P	TMA/H2O, 130C, non-shaking	13	?	2--3	87	2.6--5.4	Graphite	2.0-4.7	RT	0,1	0,1	-	240	239	-	142(22)	-	-	10.1021/acsami.8b09550	2018
41	Li1.2Mn0.55Ni0.15Co0.1O2	Al2O3	P	TMA/H2O, 250C, shaking	15	?	2--3	87	2.6--5.4	Graphits	2.0-4.7	RT	0,1	0,1	-	240	157	75	-	-	-	10.1021/acsami.8b09550	2018
42	Li1.2Mn0.54Co0.13Ni0.13O2	-	-	-	-	-	-	80	2,9	Li	2.0-4.6	25	0.333	0.333	-	200	216	-	143(47)	-	-	10.1002/aenm.201300269	2013
42	Li1.2Mn0.54Co0.13Ni0.13O2	Al2O3	P	TMA/H2O, 150C	10	?	2--3	80	2,9	Li	2.0-4.6	25	0.333	0.333	-	200	191	-	156(47)	-	-	10.1002/aenm.201300269	2013
42	Li1.2Mn0.54Co0.13Ni0.13O2	-	-	-	-	-	-	80	2,9	Li	2.0-4.6	55	0.333	0.333	-	200	216	-	157(47)	-	-	10.1002/aenm.201300269	2013
42	Li1.2Mn0.54Co0.13Ni0.13O2	Al2O3	P	TMA/H2O, 150C	10	?	2--3	80	2,9	Li	2.0-4.6	55	0.333	0.333	-	200	183	-	152(47)	-	-	10.1002/aenm.201300269	2013
42	Li1.2Mn0.54Co0.13Ni0.13O2	-	-	-	-	-	-	80	2,9	MCMB	2.0-4.5	25	0.333	0.333	-	200	213	-	160(47)	-	-	10.1002/aenm.201300269	2013
42	Li1.2Mn0.54Co0.13Ni0.13O2	Al2O3	P	TMA/H2O, 150C	10	?	2--3	80	2,9	MCMB	2.0-4.5	25	0.333	0.333	-	200	171	-	142(47)	-	-	10.1002/aenm.201300269	2013
42	Li1.2Mn0.54Co0.13Ni0.13O2	-	-	-	-	-	-	80	2,9	MCMB	2.0-4.5	55	0.333	0.333	-	200	208	-	147(47)	-	-	10.1002/aenm.201300269	2013
42	Li1.2Mn0.54Co0.13Ni0.13O2	Al2O3	P	TMA/H2O, 150C	10	?	2--3	80	2,9	MCMB	2.0-4.5	55	0.333	0.333	-	200	164	-	107(47)	-	-	10.1002/aenm.201300269	2013
43	Li1.2Mn0.54Co0.13Ni0.13O2	-	-	-	-	-	-	75	?	Li	2.0-4.8	RT	1	1	-	250	115	66	-	5	5	10.1016/j.jpowsour.2013.08.071	2014
43	Li1.2Mn0.54Co0.13Ni0.13O2	Al2O3	P	TMA/H2O, 120C	6	?	?	75	?	Li	2.0-4.8	RT	1	1	-	250	97	88	-	5	7	10.1016/j.jpowsour.2013.08.071	2014
44	Li1.33Ni0.27Mn0.60Co0.13O2+d	-	-	-	-	-	-	93	7,3	Graphite	2.0-4.6	RT	0,16	0,16	-	250	241	-	162(97)	-	-	10.1149/2.0101913jes	2019
44	Li1.33Ni0.27Mn0.60Co0.13O2+d	Al2O3	P	?	?	?	?	93	7,3	Graphite	2.0-4.6	RT	0,16	0,16	-	250	239	-	198(97)	-	-	10.1149/2.0101913jes	2019
45	0.35Li2MnO3·0.65LiNi0.35Mn0.45Co0.20O2	-	-	-	-	-	-	80	3,2	Li	2.0-4.8	RT	0,333	0,333	-	250	218	-	215(12)	-	-	10.1016/j.ensm.2018.12.014	2019
45	0.35Li2MnO3·0.65LiNi0.35Mn0.45Co0.20O2	Al2O3	P	TMA/-, 200C	50	-	-	80	3,2	Li	2.0-4.8	RT	0,333	0,333	-	250	236	-	233(12)	-	-	10.1016/j.ensm.2018.12.014	2019
46	0.33Li2MnO3·0.67Li(Ni0.4Co0.2Mn0.4)O2	-	-	-	-	-	-	92,5	6--7	Li	2.0-4.7	30	1	1	-	250	221	156	63(392)	3	~175	10.1002/adfm.202008083	2021
46	0.33Li2MnO3·0.67Li(Ni0.4Co0.2Mn0.4)O2	Al2O3	P	Commercial(BASF)	2	?	?	92,5	6--7	Li	2.0-4.7	30	1	1	-	250	215	197	100(392)	3	174	10.1002/adfm.202008083	2021
Others
47	Li1.2Ti0.4Mn0.4O2	-	-	-	-	-	-	70	3,1	Li	1.5-4.8	RT	0,05	0,05	-	200	286	-	228(15)	-	-	10.3389/fchem.2019.00107	2019
47	Li1.2Ti0.4Mn0.4O2	Al2O3	P	TMA/H2O, 200C	16	?	?	70	3,1	Li	1.5-4.8	RT	0,05	0,05	-	200	289	-	246(15)	-	-	10.3389/fchem.2019.00107	2019
47	Li1.2Ti0.4Mn0.4O2	Al2O3	P	TMA/H2O, 200C	24	?	3--5	70	3,1	Li	1.5-4.8	RT	0,05	0,05	-	200	293	-	267(15)	-	-	10.3389/fchem.2019.00107	2019
47	Li1.2Ti0.4Mn0.4O2	Al2O3	P	TMA/H2O, 200C	40	?	?	70	3,1	Li	1.5-4.8	RT	0,05	0,05	-	200	295	-	249(15)	-	-	10.3389/fchem.2019.00107	2019
48	Li1.3Mn(II)0.1Co0.1Mn(III)0.1Cr0.1Ti0.1Nb0.2O1.7F0.3	-	-	-	-	-	-	70	2-3	Li	1.5-4.8	RT	0.1	0.1	-	200	~256.4	-	~118.8 (50)	2	~52	10.1002/sstr.202400005	2024
48	Li1.3Mn(II)0.1Co0.1Mn(III)0.1Cr0.1Ti0.1Nb0.2O1.7F0.3	Al2O3	P	TMA/H2O, 200C	10	1-3	1-3	70	2-3	Li	1.5-4.8	RT	0.1	0.1	-	200	~275.1	-	~166.3 (50)	2	~96	10.1002/sstr.202400005	2024
48	Li1.3Mn(II)0.1Co0.1Mn(III)0.1Cr0.1Ti0.1Nb0.2O1.7F0.3	Al2O3	P	TMA/H2O, 200C	20	1-3	2-6	70	2-3	Li	1.5-4.8	RT	0.1	0.1	-	200	~262.8	-	~162 (50)	-	-	10.1002/sstr.202400005	2024
48	Li1.3Mn(II)0.1Co0.1Mn(III)0.1Cr0.1Ti0.1Nb0.2O1.7F0.3	Al2O3	P	TMA/H2O, 200C	50	1-3	5-15	70	2-3	Li	1.5-4.8	RT	0.1	0.1	-	200	~245.5	-	~140.9 (50)	-	-	10.1002/sstr.202400005	2024
49	LTMO Mo01	-	-	-	-	-	-	70	4.4	Li foil	1.5-4.8	RT	1	1	-	10	291.6	-	131.8 (30)	-	-	10.3390/coatings12111613	2022
49	LTMO Mo01	Al2O3	P	Al(CH3)3/H2O, 200C	8	?	?	70	4.4	Li foil	1.5-4.8	RT	1	1	-	10	283.7	-	193.6 (30)	-	-	10.3390/coatings12111613	2022
49	LTMO Mo01	Al2O3	P	Al(CH3)3/H2O, 200C	24	?	?	70	4.4	Li foil	1.5-4.8	RT	1	1	-	10	277	-	228.4 (30)	-	-	10.3390/coatings12111613	2022
49	LTMO Mo01	Al2O3	P	Al(CH3)3/H2O, 200C	40	?	2-3	70	4.4	Li foil	1.5-4.8	RT	1	1	-	10	~270	-	204.5 (30)	-	-	10.3390/coatings12111613	2022

## Sheet: Other oxides
#	Materials		ALD features					Electrochemical cycling conditions									Capacity at cycle (long-term), mAh/g			Ratecap test		Source data
	Electrode material	Coating material	Type of coating (P/E)	ALD conditions: precursors, T, reactor type	# ALD cycles	Growth rate, Å/cycle	Thickness, nm	Active material, wt%	Active material mass loading, mg/cm2	Negative electrode	Potential range, V	Temperature, °C	Charge current rate, C-units	Discharge current rate, C-units	Measurements in CCCV mode	Current at 1C, mA/g	1st	100th (if available)	largest (number of cycles), "-" if exactly 100	max C-rate, C-units (C-charge, D-discharge)	1st cycle capacity	Ref (DOI)	Year
LCO
1	LCO	-	-	-	-	-	-	80	?	Li	3.0-4.5	RT	1	1	-	140	165	117	-	700 mA/g	42.3	10.1016/j.jpowsour.2013.08.042	2014
1	LCO	ZrO2	P	Zr(NMe2)4/H2O, 100C	2	1.28	2.56	80	?	Li	3.0-4.5	RT	1	1	-	140	146	102	-	700 mA/g	44.2	10.1016/j.jpowsour.2013.08.042	2014
1	LCO	-	-	-	-	-	-	83	?	Li	3.3-4.5	RT	1	1	-	140	153	68.1	62.8 (118)	-	-	10.1149/1.3258274	2010
1	LCO	ZnO	P	DEZ/H2O, 180C, RR	4	?	?	83	?	Li	3.3-4.5	RT	1	1	-	140	160.2	79.6	-	-	-	10.1149/1.3258274	2010
Spinel-type materials
2	LMO	-	-	-	-	-	-	80	?	Li	3.4-4.5	55	1	1	-	120	124.1	97.1	-	-	-	10.1016/j.nanoen.2013.03.005	2013
2	LMO	-	-	-	-	-	-	80	?	Li	3.4-4.5	55	5	5	-	120	114.6	58.8	-	-	-	10.1016/j.nanoen.2013.03.005	2013
2	LMO	ZrO2	P	Zr(O(CH3)3)4/H2O, 120C	2	~2.0	0.4	80	?	Li	3.4-4.5	55	1	1	-	120	135.1	97.1	-	-	-	10.1016/j.nanoen.2013.03.005	2013
2	LMO	ZrO2	P	Zr(O(CH3)3)4/H2O, 120C	2	~2.0	0.4	80	?	Li	3.4-4.5	55	5	5	-	120	123.4	~58.9	-	-	-	10.1016/j.nanoen.2013.03.005	2013
2	LMO	ZrO2	P	Zr(O(CH3)3)4/H2O, 120C	6	~2.0	1.2	80	?	Li	3.4-4.5	55	1	1	-	120	136	111.3	-	-	-	10.1016/j.nanoen.2013.03.005	2013
2	LMO	ZrO2	P	Zr(O(CH3)3)4/H2O, 120C	6	~2.0	1.2	80	?	Li	3.4-4.5	55	5	5	-	120	112.7	76.9	-	-	-	10.1016/j.nanoen.2013.03.005	2013
2	LMO	ZrO2	P	Zr(O(CH3)3)4/H2O, 120C	10	~2.0	2	80	?	Li	3.4-4.5	55	1	1	-	120	106.6	~85.4	-	-	-	10.1016/j.nanoen.2013.03.005	2013
2	LMO	ZrO2	P	Zr(O(CH3)3)4/H2O, 120C	10	~2.0	2	80	?	Li	3.4-4.5	55	5	5	-	120	88.5	~54.4	-	-	-	10.1016/j.nanoen.2013.03.005	2013
3	LMO	-	-	-	-	-	-	80	4.5	Li	3.5-4.5	RT	1	1	-	148	129.6	~116	107.7 (250)	3	~83.8	10.1021/acsenergylett.3c01560	2023
3	LMO	MgO	P	Mg(C5H5)2/H2O, 150	2	?	?	80	4.5	Li	3.5-4.5	RT	1	1	-	148	~79.7	~102	-	-	-	10.1021/acsenergylett.3c01560	2023
3	LMO	MgO	P	Mg(C5H5)2/H2O, 150	5	?	?	80	4.5	Li	3.5-4.5	RT	1	1	-	148	~57.4	~93.5	-	-	-	10.1021/acsenergylett.3c01560	2023
3	LMO	MgO	P	Mg(C5H5)2/H2O, 150	10	?	?	80	4.5	Li	3.5-4.5	RT	1	1	-	148	~6.5	~61.6	-	-	-	10.1021/acsenergylett.3c01560	2023
4	LMO	-	-	-	-	-	-	80	~3.5	Li	3.4-4.5	25	1	1	-	120	65.7	32.4	-	-	-	10.1007/s10008-012-1962-6	2012
4	LMO	ZnO	P	DEZ/H2O, 120C	6	1.74	1.044	80	~3.5	Li	3.4-4.5	25	1	1	-	120	74.6	47.6	-	-	-	10.1007/s10008-012-1962-6	2012
4	LMO	ZrO2	P	Zr(O(CH3)3)4/H2O, 120C	6	2.9	1.74	80	~3.5	Li	3.4-4.5	25	1	1	-	120	58.7	38.5	-	-	-	10.1007/s10008-012-1962-6	2012
4	LMO	-	-	-	-	-	-	80	~3.5	Li	3.4-4.5	55	1	1	-	120	52.9	27	-	-	-	10.1007/s10008-012-1962-6	2012
4	LMO	ZnO	P	DEZ/H2O, 120C	6	1.74	1.044	80	~3.5	Li	3.4-4.5	55	1	1	-	120	90.7	56.1	-	-	-	10.1007/s10008-012-1962-6	2012
4	LMO	ZrO2	P	Zr(O(CH3)3)4/H2O, 120C	6	2.9	1.74	80	~3.5	Li	3.4-4.5	55	1	1	-	120	88.1	51.1	-	-	-	10.1007/s10008-012-1962-6	2012
5	LMO	-	-	-	-	-	-	80	?	Li	3.4-4.5	25	1	1	-	?	61	~39.4	24 (1000)	2	19.5	10.1002/admi.201500046	2015
5	LMO	-	-	-	-	-	-	80	?	Li	3.4-4.5	55	1	1	-	?	~53.3	~38	~16.1 (1000)	2	17.7	10.1002/admi.201500046	2015
5	LMO	ZrO2	P	Zr(NMe2)4/H2O, 250C, FBR	5	?	?	80	?	Li	3.4-4.5	25	1	1	-	?	61	~49	~38 (1000)	2	26.4	10.1002/admi.201500046	2015
5	LMO	ZrO2	P	Zr(NMe2)4/H2O, 250C, FBR	5	?	?	80	?	Li	3.4-4.5	55	1	1	-	?	~59.4	~55.9	~49.2 (1000)	2	26.5	10.1002/admi.201500046	2015
5	LMO	CeO2	P	Ce(iPrCp)3	10	?	?	80	?	Li	3.4-4.5	25	1	1	-	?	-	-	-	2	25.5	10.1002/admi.201500046	2015
5	LMO	CeO2	P	Ce(iPrCp)3	10	?	?	80	?	Li	3.4-4.5	55	1	1	-	?	-	-	-	2	23.2	10.1002/admi.201500046	2015
5	LMO	CeO2	P	Ce(iPrCp)3	30	?	?	80	?	Li	3.4-4.5	25	1	1	-	?	~77.1	~70.3	~54.1 (1000)	2	32.5	10.1002/admi.201500046	2015
5	LMO	CeO2	P	Ce(iPrCp)3	30	?	?	80	?	Li	3.4-4.5	55	1	1	-	?	~71	~68.7	~59.2 (1000)	2	38	10.1002/admi.201500046	2015
5	LMO	CeO2	P	Ce(iPrCp)3	50	?	3	80	?	Li	3.4-4.5	25	1	1	-	?	80	~81	78 (1000)	2	46.1	10.1002/admi.201500046	2015
5	LMO	CeO2	P	Ce(iPrCp)3	50	?	3	80	?	Li	3.4-4.5	55	1	1	-	?	81	~80	76.6 (1000)	2	45.4	10.1002/admi.201500046	2015
5	LMO	CeO2	P	Ce(iPrCp)3	100	?	5	80	?	Li	3.4-4.5	25	1	1	-	?	~57	~52.6	~28.6 (1000)	2	22.1	10.1002/admi.201500046	2015
5	LMO	CeO2	P	Ce(iPrCp)3	100	?	5	80	?	Li	3.4-4.5	55	1	1	-	?	~53.4	~48.7	23.3 (1000)	2	19.8	10.1002/admi.201500046	2015
5	LMO	CeO2	P	Ce(iPrCp)3	150	?	?	80	?	Li	3.4-4.5	25	1	1	-	?	-	-	-	2	14.6	10.1002/admi.201500046	2015
5	LMO	CeO2	P	Ce(iPrCp)3	150	?	?	80	?	Li	3.4-4.5	55	1	1	-	?	-	-	-	2	11.4	10.1002/admi.201500046	2015
6	LMO	-	-	-	-	-	-	80	?	Li	3.4-4.5	25	1	1	-	148	~60	~56	~47 (500)	-	-	10.1002/adts.202000002	2020
6	LMO	-	-	-	-	-	-	80	?	Li	3.4-4.5	55	1	1	-	148	~53.7	~48.8	~35.8 (500)	-	-	10.1002/adts.202000002	2020
6	LMO	CeO2	P	Ce(iPrCp)3/H2O, 250C, FBR	100	?	~5	80	?	Li	3.4-4.5	25	1	1	-	148	~57.6	~52.7	~49.4 (500)	-	-	10.1002/adts.202000002	2020
6	LMO	CeO2	P	Ce(iPrCp)3/H2O, 250C, FBR	100	?	~5	80	?	Li	3.4-4.5	55	1	1	-	148	~51.7	~38	~24.7 (500)	-	-	10.1002/adts.202000002	2020
7	LMO	-	-	-	-	-	-	80	10 mg/?	Li	3.4-4.5	25	1	1	-	120	65.7	~32.5	-	-	-	doi.org/10.1021/jp3010629	2012
7	LMO	ZnO	P	DEZ/H2O, 120C	2	1.7	0.34	80	10 mg/?	Li	3.4-4.5	25	1	1	-	120	~58.6	~34.8	-	-	-	doi.org/10.1021/jp3010629	2012
7	LMO	ZnO	P	DEZ/H2O, 120C	6	1.7	1.02	80	10 mg/?	Li	3.4-4.5	25	1	1	-	120	74.6	~47.6	-	-	-	doi.org/10.1021/jp3010629	2012
7	LMO	ZnO	P	DEZ/H2O, 120C	10	1.7	1.7	80	10 mg/?	Li	3.4-4.5	25	1	1	-	120	~53.5	~37.3	-	-	-	doi.org/10.1021/jp3010629	2012
7	LMO	-	-	-	-	-	-	80	10 mg/?	Li	3.4-4.5	55	1	1	-	120	52.9	27	-	-	-	doi.org/10.1021/jp3010629	2012
7	LMO	ZnO	P	DEZ/H2O, 120C	2	1.7	0.34	80	10 mg/?	Li	3.4-4.5	55	1	1	-	120	~89.3	~51	-	-	-	doi.org/10.1021/jp3010629	2012
7	LMO	ZnO	P	DEZ/H2O, 120C	6	1.7	1.02	80	10 mg/?	Li	3.4-4.5	55	1	1	-	120	90.8	56.1	-	-	-	doi.org/10.1021/jp3010629	2012
7	LMO	ZnO	P	DEZ/H2O, 120C	10	1.7	1.7	80	10 mg/?	Li	3.4-4.5	55	1	1	-	120	~86.3	~43.6	-	-	-	doi.org/10.1021/jp3010629	2012
8	LMO	-	-	-	-	-	-	80	?	Li	3.4-4.5	RT	1	1	-	120	127	109.9	-	2	~10	doi.org/10.1016/j.jmst.2014.03.007	2014
8	LMO-graphene	-	-	-	-	-	-	85	?	Li	3.4-4.5	RT	1	1	-	120	135	115.6	-	2	~72	doi.org/10.1016/j.jmst.2014.03.007	2014
8	LMO-graphene	ZnO	P	DEZ/H2O, 120C	6	-	-	85	?	Li	3.4-4.5	RT	1	1	-	120	140	122.3	-	2	~43	doi.org/10.1016/j.jmst.2014.03.007	2014
9	LMO	-	-	-	-	-	-	80	?	Li	3.4-4.5	55	1	1	-	120	~88.4	~51.3	-	5	~0	doi.org/10.1039/C2CC33522K	2012
9	LMO	ZrO2	P	Zr(O(CH3)3)4/H2O, 120C	6	2.9	1.74	80	?	Li	3.4-4.5	55	1	1	-	120	~53.2	~27.6	-	5	~19	doi.org/10.1039/C2CC33522K	2012
10	LNMO	-	-	-	-	-	-	80	?	Li	3.5-5.0	25	1	1	-	?	~115.3	~104.1	~90.4 (1000)	2	~84.04	10.1149/2.0371701jes	2017
10	LNMO	-	-	-	-	-	-	80	?	Li	3.5-5.0	55	1	1	-	?	~115.1	~109.7	~95.1 (1000)	2	~84.8	10.1149/2.0371701jes	2017
10	LNMO	-	-	-	-	-	-	80	?	Li	3.5-5.0	25	2	2	-	?	~71.3	~64.9	~51.7 (1000)	-	-	10.1149/2.0371701jes	2017
10	LNMO	-	-	-	-	-	-	80	?	Li	3.5-5.0	55	2	2	-	?	~87.1	~55.3	0 (1000)	-	-	10.1149/2.0371701jes	2017
10	LNMO	CeO2	P	Ce(iPrCp)3/H2O, 250C, FBR	30	0.6	1.8	80	?	Li	3.5-5.0	25	1	1	-	?	~129.2	~126.9	~121.6 (1000)	2	~91.03	10.1149/2.0371701jes	2017
10	LNMO	CeO2	P	Ce(iPrCp)3/H2O, 250C, FBR	30	0.6	1.8	80	?	Li	3.5-5.0	55	1	1	-	?	~132.8	~121.3	~113.7 (1000)	2	~92.2	10.1149/2.0371701jes	2017
10	LNMO	CeO2	P	Ce(iPrCp)3/H2O, 250C, FBR	30	0.6	1.8	80	?	Li	3.5-5.0	25	2	2	-	?	~84.0	~82.6	~78.8 (1000)	-	-	10.1149/2.0371701jes	2017
10	LNMO	CeO2	P	Ce(iPrCp)3/H2O, 250C, FBR	30	0.6	1.8	80	?	Li	3.5-5.0	55	2	2	-	?	~77.6	~74.9	~64.6 (1000)	-	-	10.1149/2.0371701jes	2017
10	LNMO	CeO2	P	Ce(iPrCp)3/H2O, 250C, FBR	40	0.6	2.4	80	?	Li	3.5-5.0	25	1	1	-	?	~132.4	~131.6	~126.9 (1000)	2	~93.5	10.1149/2.0371701jes	2017
10	LNMO	CeO2	P	Ce(iPrCp)3/H2O, 250C, FBR	40	0.6	2.4	80	?	Li	3.5-5.0	55	1	1	-	?	~127.8	~126.8	~117.1 (1000)	2	~94.2	10.1149/2.0371701jes	2017
10	LNMO	CeO2	P	Ce(iPrCp)3/H2O, 250C, FBR	40	0.6	2.4	80	?	Li	3.5-5.0	25	2	2	-	?	~86.5	~85.6	~81.5 (1000)	-	-	10.1149/2.0371701jes	2017
10	LNMO	CeO2	P	Ce(iPrCp)3/H2O, 250C, FBR	40	0.6	2.4	80	?	Li	3.5-5.0	55	2	2	-	?	~84.6	~78.9	~56.0 (1000)	-	-	10.1149/2.0371701jes	2017
10	LNMO	CeO2	P	Ce(iPrCp)3/H2O, 250C, FBR	50	0.6	3	80	?	Li	3.5-5.0	25	1	1	-	?	~135.37	~135.0	~134.3 (1000)	2	~96.8	10.1149/2.0371701jes	2017
10	LNMO	CeO2	P	Ce(iPrCp)3/H2O, 250C, FBR	50	0.6	3	80	?	Li	3.5-5.0	55	1	1	-	?	~130.7	~132.4	~127.3 (1000)	2	~98.4	10.1149/2.0371701jes	2017
10	LNMO	CeO2	P	Ce(iPrCp)3/H2O, 250C, FBR	50	0.6	3	80	?	Li	3.5-5.0	25	2	2	-	?	~90.5	~89.1	~82.8 (1000)	-	-	10.1149/2.0371701jes	2017
10	LNMO	CeO2	P	Ce(iPrCp)3/H2O, 250C, FBR	50	0.6	3	80	?	Li	3.5-5.0	55	2	2	-	?	~89	~83.7	~74 (1000)	-	-	10.1149/2.0371701jes	2017
10	LNMO	CeO2	P	Ce(iPrCp)3/H2O, 250C, FBR	70	0.6	4.2	80	?	Li	3.5-5.0	25	1	1	-	?	~121	~119.8	~109.3 (1000)	2	~86.5	10.1149/2.0371701jes	2017
10	LNMO	CeO2	P	Ce(iPrCp)3/H2O, 250C, FBR	70	0.6	4.2	80	?	Li	3.5-5.0	55	1	1	-	?	~118.7	~113.8	~103.7 (1000)	2	~87.3	10.1149/2.0371701jes	2017
10	LNMO	CeO2	P	Ce(iPrCp)3/H2O, 250C, FBR	70	0.6	4.2	80	?	Li	3.5-5.0	25	2	2	-	?	0	0	0 (1000)	-	-	10.1149/2.0371701jes	2017
10	LNMO	CeO2	P	Ce(iPrCp)3/H2O, 250C, FBR	70	0.6	4.2	80	?	Li	3.5-5.0	55	2	2	-	?	~69.2	~69.3	~49.7 (1000)	-	-	10.1149/2.0371701jes	2017
10	LNMO	CeO2	P	Ce(iPrCp)3/H2O, 250C, FBR	100	0.6	6	80	?	Li	3.5-5.0	25	1	1	-	?	~100.2	~98.5	~89.8 (1000)	2	~80.1	10.1149/2.0371701jes	2017
10	LNMO	CeO2	P	Ce(iPrCp)3/H2O, 250C, FBR	100	0.6	6	80	?	Li	3.5-5.0	55	1	1	-	?	~121.7	~102.9	~79.3 (1000)	2	~84.8	10.1149/2.0371701jes	2017
10	LNMO	CeO2	P	Ce(iPrCp)3/H2O, 250C, FBR	100	0.6	6	80	?	Li	3.5-5.0	25	2	2	-	?	~65.3	~61.8	~49.7 (1000)	-	-	10.1149/2.0371701jes	2017
10	LNMO	CeO2	P	Ce(iPrCp)3/H2O, 250C, FBR	100	0.6	6	80	?	Li	3.5-5.0	55	2	2	-	?	~75.1	~54.1	0 (1000)	-	-	10.1149/2.0371701jes	2017
11	LNMO	-	-	-	-	-	-	80	?	Li	3.5-5.0	25	1	1	-	?	114	91.9	80 (1000)	2	~74.3	10.1038/srep25293	2016
11	LNMO	-	-	-	-	-	-	80	?	Li	3.5-5.0	55	1	1	-	?	~109.9	~105.5	~82.7 (1000)	2	~72.6	10.1038/srep25293	2016
11	LNMO	-	-	-	-	-	-	80	?	Li	3.5-5.0	25	2	2	-	?	~69.9	~63.8	~50.9 (1000)	-	-	10.1038/srep25293	2016
11	LNMO	-	-	-	-	-	-	80	?	Li	3.5-5.0	55	2	2	-	?	~71.2	~68.4	~45.1 (1000)	-	-	10.1038/srep25293	2016
11	LNMO	FeOx	P	FeCp2/O2, 450C, FBR	10	~0.2	0.2	80	?	Li	3.5-5.0	25	1	1	-	?	~110.5	~108.5	~99.1 (1000)	2	~88.4	10.1038/srep25293	2016
11	LNMO	FeOx	P	FeCp2/O2, 450C, FBR	10	~0.2	0.2	80	?	Li	3.5-5.0	55	1	1	-	?	~124.2	~120.1	~66.5 (1000)	2	~85.2	10.1038/srep25293	2016
11	LNMO	FeOx	P	FeCp2/O2, 450C, FBR	10	~0.2	0.2	80	?	Li	3.5-5.0	25	2	2	-	?	~76.3	~72.1	~41.2 (1000)	-	-	10.1038/srep25293	2016
11	LNMO	FeOx	P	FeCp2/O2, 450C, FBR	10	~0.2	0.2	80	?	Li	3.5-5.0	55	2	2	-	?	~76.4	~72.1	~41.4 (1000)	-	-	10.1038/srep25293	2016
11	LNMO	FeOx	P	FeCp2/O2, 450C, FBR	20	~0.2	0.4	80	?	Li	3.5-5.0	25	1	1	-	?	~121	~119.9	~109.5 (1000)	2	~77.8	10.1038/srep25293	2016
11	LNMO	FeOx	P	FeCp2/O2, 450C, FBR	20	~0.2	0.4	80	?	Li	3.5-5.0	55	1	1	-	?	~118.3	~113.8	~103.9 (1000)	2	~76.7	10.1038/srep25293	2016
11	LNMO	FeOx	P	FeCp2/O2, 450C, FBR	20	~0.2	0.4	80	?	Li	3.5-5.0	25	2	2	-	?	~74	~72.7	~60.7 (1000)	-	-	10.1038/srep25293	2016
11	LNMO	FeOx	P	FeCp2/O2, 450C, FBR	20	~0.2	0.4	80	?	Li	3.5-5.0	55	2	2	-	?	~74.1	~72.8	~60.6 (1000)	-	-	10.1038/srep25293	2016
11	LNMO	FeOx	P	FeCp2/O2, 450C, FBR	25	~0.2	0.5	80	?	Li	3.5-5.0	25	1	1	-	?	~114.8	~114.7	~113.3 (1000)	2	~83.2	10.1038/srep25293	2016
11	LNMO	FeOx	P	FeCp2/O2, 450C, FBR	25	~0.2	0.5	80	?	Li	3.5-5.0	55	1	1	-	?	~109.4	~111.6	~107.5 (1000)	2	~81.4	10.1038/srep25293	2016
11	LNMO	FeOx	P	FeCp2/O2, 450C, FBR	25	~0.2	0.5	80	?	Li	3.5-5.0	25	2	2	-	?	~88.8	~80.1	~72.3 (1000)	-	-	10.1038/srep25293	2016
11	LNMO	FeOx	P	FeCp2/O2, 450C, FBR	25	~0.2	0.5	80	?	Li	3.5-5.0	55	2	2	-	?	~81.1	~80.9	~46 (1000)	-	-	10.1038/srep25293	2016
11	LNMO	FeOx	P	FeCp2/O2, 450C, FBR	30	~0.2	0.6	80	?	Li	3.5-5.0	25	1	1	-	?	143	~139.7	133 (1000)	2	~94.7	10.1038/srep25293	2016
11	LNMO	FeOx	P	FeCp2/O2, 450C, FBR	30	~0.2	0.6	80	?	Li	3.5-5.0	55	1	1	-	?	~140	~131.4	125 (1000)	2	~95.6	10.1038/srep25293	2016
11	LNMO	FeOx	P	FeCp2/O2, 450C, FBR	30	~0.2	0.6	80	?	Li	3.5-5.0	25	2	2	-	?	~98.3	~92	~87.7 (1000)	-	-	10.1038/srep25293	2016
11	LNMO	FeOx	P	FeCp2/O2, 450C, FBR	30	~0.2	0.6	80	?	Li	3.5-5.0	55	2	2	-	?	~98.3	~92	87.7 (1000)	-	-	10.1038/srep25293	2016
11	LNMO	FeOx	P	FeCp2/O2, 450C, FBR	40	~0.2	0.8	80	?	Li	3.5-5.0	25	1	1	-	?	~136.6	~135.6	~129.7 (1000)	2	~93.3	10.1038/srep25293	2016
11	LNMO	FeOx	P	FeCp2/O2, 450C, FBR	40	~0.2	0.8	80	?	Li	3.5-5.0	55	1	1	-	?	~140	~138.3	~127.8 (1000)	2	~93.4	10.1038/srep25293	2016
11	LNMO	FeOx	P	FeCp2/O2, 450C, FBR	40	~0.2	0.8	80	?	Li	3.5-5.0	25	2	2	-	?	~91.1	~90.1	~85.8 (1000)	-	-	10.1038/srep25293	2016
11	LNMO	FeOx	P	FeCp2/O2, 450C, FBR	40	~0.2	0.8	80	?	Li	3.5-5.0	55	2	2	-	?	~90.9	~90.2	~85.9 (1000)	-	-	10.1038/srep25293	2016
11	LNMO	FeOx	P	FeCp2/O2, 450C, FBR	80	~0.2	1.6	80	?	Li	3.5-5.0	25	1	1	-	?	~127.1	~99.9	~44.5 (1000)	2	~75.6	10.1038/srep25293	2016
11	LNMO	FeOx	P	FeCp2/O2, 450C, FBR	80	~0.2	1.6	80	?	Li	3.5-5.0	55	1	1	-	?	~123.8	~116.6	~59 (1000)	2	~71.3	10.1038/srep25293	2016
11	LNMO	FeOx	P	FeCp2/O2, 450C, FBR	80	~0.2	1.6	80	?	Li	3.5-5.0	25	2	2	-	?	~73	~65.4	~41.2 (1000)	-	-	10.1038/srep25293	2016
11	LNMO	FeOx	P	FeCp2/O2, 450C, FBR	80	~0.2	1.6	80	?	Li	3.5-5.0	55	2	2	-	?	~67.9	~61.1	~21 (1000)	-	-	10.1038/srep25293	2016
12	LNMO	-	-	-	-	-	-	90	5	Li	3.6-4.9	20	0.5	0.5	-	140	~130.4	~127.6	-	2	~101.8	10.1002/cssc.202200324	2022
12	LNMO	-	-	-	-	-	-	90	5	Li	3.6-4.9	50	0.5	0.5	-	140	~128	~101.6	-	-	-	10.1002/cssc.202200324	2022
12	LNMO	TiO2	P	TiCl4/H2O, 250C	5	?	0.2	90	5	Li	3.6-4.9	20	0.5	0.5	-	140	~130.2	~124.4	-	2	~92.9	10.1002/cssc.202200324	2022
12	LNMO	TiO2	P	TiCl4/H2O, 250C	5	?	0.2	90	5	Li	3.6-4.9	50	0.5	0.5	-	140	~133.2	~92.6	-	-	-	10.1002/cssc.202200324	2022
12	LNMO	TiO2	P	TiCl4/H2O, 250C	10	?	0.3	90	5	Li	3.6-4.9	20	0.5	0.5	-	140	~127.8	~119.6	-	2	~68.7	10.1002/cssc.202200324	2022
12	LNMO	TiO2	P	TiCl4/H2O, 250C	10	?	0.3	90	5	Li	3.6-4.9	50	0.5	0.5	-	140	~120.2	~61.4	-	-	-	10.1002/cssc.202200324	2022
12	LNMO	TiO2	P	TiCl4/H2O, 250C	20	?	0.6	90	5	Li	3.6-4.9	20	0.5	0.5	-	140	~124	~119.4	-	2	~68.1	10.1002/cssc.202200324	2022
12	LNMO	TiO2	P	TiCl4/H2O, 250C	20	?	0.6	90	5	Li	3.6-4.9	50	0.5	0.5	-	140	~131.4	~105.4	-	-	-	10.1002/cssc.202200324	2022
12	LNMO	-	-	-	-	-	-	90	7.5	Graphite	3.6-4.8	20	0.5	0.5	-	130	120	~88.7	~55.2 (196)	-	-	10.1002/cssc.202200324	2022
12	LNMO	TiO2	P	TiCl4/H2O, 250C	20	?	0.6	90	7.5	Graphite	3.6-4.8	20	0.5	0.5	-	130	100	~84.2	~74.9 (196)	-	-	10.1002/cssc.202200324	2022
13	LNMO	-	-	-	-	-	-	80	2.29-2.54	Li	3.5-5.0	RT	0.5	0.5	-	?	115	79.2	~54.3 (300)	5	~38.1	10.1016/j.nanoen.2019.103988	2019
13	LNMO	TiO2	P	TTIP/H2O, 250C	10	1	~1	80	2.29-2.54	Li	3.5-5.0	RT	0.5	0.5	-	?	~114.4	~90.6	-	5	58	10.1016/j.nanoen.2019.103988	2019
13	LNMO	-	-	-	-	-	-	80	?	Li	3.5-5.0	25	0.5	0.5	-	147	116	~104.9	85.956 (350)	5	~68.1	10.1002/adma.201703764	2017
13	LNMO	TiO2	P	TTIP/H2O, 150C	25	?	≈2	80	?	Li	3.5-5.0	25	0.5	0.5	-	147	80	~81	68.2 (350)	5	~43.9	10.1002/adma.201703764	2017
13	LNMO	-	-	-	-	-	-	80	?	Li	3.5-5.0	25	0.5	0.5	-	147	116	~104.9	85.956 (350)	5	~68.1	10.1002/adma.201703764	2017
13	LNMO	-	-	-	-	-	-	80	?	Li	3.5-5.0	55	0.5	0.5	-	147	~116.8	-	~108.3 (50)	-	-	10.1002/adma.201703764	2017
13	LNMO	TiO2	P	TTIP/H2O, 150C	5	?	?	80	?	Li	3.5-5.0	25	0.5	0.5	-	147	~116.4	~107.3	~95.3 (350)	5	~45.9	10.1002/adma.201703764	2017
13	LNMO	TiO2	P	TTIP/H2O, 150C	5	?	?	80	?	Li	3.5-5.0	55	0.5	0.5	-	147	~119.8	-	~109.4 (50)	-	-	10.1002/adma.201703764	2017
13	LNMO	TiO2	P	TTIP/H2O, 150C	25	?	≈2	80	?	Li	3.5-5.0	25	0.5	0.5	-	147	~121.1	~114.9	~103 (350)	5	~85.9	10.1002/adma.201703764	2017
13	LNMO	TiO2	P	TTIP/H2O, 150C	25	?	≈2	80	?	Li	3.5-5.0	55	0.5	0.5	-	147	~133.3	-	~122.4 (50)	-	-	10.1002/adma.201703764	2017
13	LNMO	TiO2	P	TTIP/H2O, 150C	50	?	?	80	?	Li	3.5-5.0	25	0.5	0.5	-	147	87	~83.9	67.3 (350)	5	0	10.1002/adma.201703764	2017
13	LNMO	TiO2	P	TTIP/H2O, 150C	50	?	?	80	?	Li	3.5-5.0	55	0.5	0.5	-	147	~108.7	-	~94.4 (50)	-	-	10.1002/adma.201703764	2017
14	LNMO nm	-	-	-	-	-	-	-	0.81 mg/?	Li	3.5-4.85	RT	0.133333	0.133333	-	?	101.12	-	-	2	0	10.1021/acsami.5b01392	2015
14	LNMO nm	TiO2	P	TiCl4/H2O, 250C	11	0.385	~0.43	-	0.81 mg/?	Li	3.5-4.85	RT	0.133333	0.133333	-	?	103.17	-	-	2	~63.6	10.1021/acsami.5b01392	2015
14	LNMO nm	TiO2	P	TiCl4/H2O, 250C	50	0.385	~1.94	-	0.81 mg/?	Li	3.5-4.85	RT	0.133333	0.133333	-	?	-	-	-	2	-	10.1021/acsami.5b01392	2015
Ni-rich NMC and NCA
15	NMC532	-	-	-	-	-	-	80	2,5	Li	2.5-4.5	25	0,5	0,5	-	200	165,7	-	143,2(60)	5	107	10.1016/j.jallcom.2015.10.187	2016
15	NMC532	ZrO2	P	Zr(NMe2)4/H2O, 150C	2	1,9	?	80	2,5	Li	2.5-4.5	25	0,5	0,5	-	200	173,2	-	155,7(60)	5	112	10.1016/j.jallcom.2015.10.187	2016
15	NMC532	ZrO2	P	Zr(NMe2)4/H2O, 150C	5	1,9	0,95	80	2,5	Li	2.5-4.5	25	0,5	0,5	-	200	193,6	-	186,2(60)	5	129	10.1016/j.jallcom.2015.10.187	2016
15	NMC532	ZrO2	P	Zr(NMe2)4/H2O, 150C	8	1,9	1,5	80	2,5	Li	2.5-4.5	25	0,5	0,5	-	200	184,1	-	175,8(60)	5	123	10.1016/j.jallcom.2015.10.187	2016
15	NMC532	-	-	-	-	-	-	80	2,5	Li	2.5-4.5	55	5	5	-	200	129,7	-	101,7(50)	-	-	10.1016/j.jallcom.2015.10.187	2016
15	NMC532	ZrO2	P	Zr(NMe2)4/H2O, 150C	5	1,9	0,95	80	2,5	Li	2.5-4.5	55	5	5	-	200	175,2	-	153,3(50)	-	-	10.1016/j.jallcom.2015.10.187	2016
16	NMC532	-	-	-	-	-	-	80	?	Li	2.5-4.5	25	0,2	0,2	-	200	187	-	186(21)	5	113	10.1016/j.jpowsour.2014.05.027	2014
16	NMC532	ZnO	P	DEZ/H2O, 100C	8	1,74	4,34	80	?	Li	2.5-4.5	25	0,2	0,2	-	200	229	-	227(21)	5	148	10.1016/j.jpowsour.2014.05.027	2014
16	NMC532	-	-	-	-	-	-	80	?	Li	2.5-4.5	25	2	2	-	200	156	-	136(60)	-	-	10.1016/j.jpowsour.2014.05.027	2014
16	NMC532	ZnO	P	DEZ/H2O, 100C	8	1,74	4,34	80	?	Li	2.5-4.5	25	2	2	-	200	188	-	172(60)	-	-	10.1016/j.jpowsour.2014.05.027	2014
16	NMC532	-	-	-	-	-	-	80	?	Li	2.5-4.5	55	1	1	-	200	196	-	188(31)	-	-	10.1016/j.jpowsour.2014.05.027	2014
16	NMC532	ZnO	P	DEZ/H2O, 100C	8	1,74	4,34	80	?	Li	2.5-4.5	55	1	1	-	200	256	-	253(31)	-	-	10.1016/j.jpowsour.2014.05.027	2014
16	NMC532	-	-	-	-	-	-	80	?	Li	2.5-4.5	55	5	5	-	200	160	-	134(29)	-	-	10.1016/j.jpowsour.2014.05.027	2014
16	NMC532	ZnO	P	DEZ/H2O, 100C	8	1,74	4,34	80	?	Li	2.5-4.5	55	5	5	-	200	225	-	208(29)	-	-	10.1016/j.jpowsour.2014.05.027	2014
17	NMC532	-	-	-	-	-	-	?	15	Li	3.0-4.3	RT	0.333	1	+	138	156	128	110(178)	0.1C-10D	40	10.1021/acsami.6b16562	2017
17	NMC532	MgO	P	Mg[EtCp]2/H2O, 200C	5	1,4	?	?	15	Li	3.0-4.3	RT	0.333	1	+	138	155	137	128(178)	0.1C-10D	116	10.1021/acsami.6b16562	2017
17	NMC532	ZrO2	P	Zr(NMe2)4/H2O, 200C	5	0,8	?	?	15	Li	3.0-4.3	RT	0.333	1	+	138	159	139	126(178)	0.1C-10D	113	10.1021/acsami.6b16562	2017
18	NMC532	-	-	-	-	-	-	?	15	Li	2.0-4.3	RT	0.333	1	+	138	156	128	117(148)	0.1C-10D	40	10.1021/acsami.5b11878	2016
18	NMC532	(Al0.75Ga0.25)2O3	P	(TMA+TMG)/(H2O+O3), 200C	5	0.9-1.1	?	?	15	Li	2.0-4.3	RT	0.333	1	+	138	157	146	141(146)	0.1C-10D	44	10.1021/acsami.5b11878	2016
18	NMC532	(Al0.5Ga0.5)2O3	P	(TMA+TMG)/(H2O+O3), 200C	5	0.9-1.1	?	?	15	Li	2.0-4.3	RT	0.333	1	+	138	150	137	131(148)	0.1C-10D	77	10.1021/acsami.5b11878	2016
18	NMC532	(Al0.25Ga0.75)2O3	P	(TMA+TMG)/(H2O+O3), 200C	5	0.9-1.1	?	?	15	Li	2.0-4.3	RT	0.333	1	+	138	153	130	128(138)	0.1C-10D	20	10.1021/acsami.5b11878	2016
18	NMC532	(Al0.5Ga0.5)2O3	P	(TMA+TMG)/(H2O+O3), 200C	2	0.9-1.1	?	?	15	Li	2.0-4.3	RT	-	-	+	138	-	-	-	0.1C-10D	91	10.1021/acsami.5b11878	2016
19	NMC622	-	-	-	-	-	-	80	?	Li	2.5-4.3	25	1	1	-	?	163	110	-	10	86	10.1039/C6DT01764A	2016
19	NMC622	-	-	-	-	-	-	80	?	Li	2.5-4.3	55	1	1	-	?	177	108	-	-	-	10.1039/C6DT01764A	2016
19	NMC622	TiO2	P	TiCl4/H2O, 200C	139	0,36	5	80	?	Li	2.5-4.3	25	1	1	-	?	170	146	-	10	95	10.1039/C6DT01764A	2016
19	NMC622	TiO2	P	TiCl4/H2O, 200C	139	0,36	5	80	?	Li	2.5-4.3	55	1	1	-	?	185	148	-	-	-	10.1039/C6DT01764A	2016
20	NMC622	-	-	-	-	-	-	90	2.5-3.5	Li	2.8-4.5	RT	1	1	-	180	169	149	140 (150)	5	121	10.1021/acs.nanolett.0c03778	2020
20	NMC622	ZrO2	P	Zr(NMe2)4/H2O, 150C	2	2,4	0,48	90	2.5-3.5	Li	2.8-4.5	RT	1	1	-	180	171	162	160 (150)	5	141	10.1021/acs.nanolett.0c03778	2020
20	NMC622	ZrO2	P	Zr(NMe2)4/H2O, 150C	5	2,4	1,2	90	2.5-3.5	Li	2.8-4.5	RT	1	1	-	180	172	167	164 (150)	5	132	10.1021/acs.nanolett.0c03778	2020
20	NMC622	ZrO2	P	Zr(NMe2)4/H2O, 150C	8	2,4	1,92	90	2.5-3.5	Li	2.8-4.5	RT	1	1	-	180	166	156	153 (150)	5	123	10.1021/acs.nanolett.0c03778	2020
21	NMC811	-	-	-	-	-	-	94	8	Li	3.0-4.5	RT	1	1	-	180	186	162	-	0.1C-3D	175	10.1149/1945-7111/aca2e5	2022
21	NMC811	Ta2O5	P	TBTDET/H2O, 250C, FBR	2	?	?	94	8	Li	3.0-4.5	RT	1	1	-	180	190	163	-	0.1C-3D	178	10.1149/1945-7111/aca2e5	2022
21	NMC811	Ta2O5	P	TBTDET/H2O, 250C, FBR	3	?	?	94	8	Li	3.0-4.5	RT	1	1	-	180	188	161	-	0.1C-3D	177	10.1149/1945-7111/aca2e5	2022
21	NMC811	Ta2O5	P	TBTDET/H2O, 250C, FBR	15	?	1--3	94	8	Li	3.0-4.5	RT	1	1	-	180	186	141	-	0.1C-3D	173	10.1149/1945-7111/aca2e5	2022
22	NMC811 (FCG)	-	-	-	-	-	-	92	15	Graphite	3.0-4.35	RT	0.3	0.3	-	?	160	154	128 (800)	5	34	10.1038/srep26532	2016
22	NMC811 (FCG)	-	-	-	-	-	-	92	15	Graphite	3.0-4.35	RT	1	1	-	?	150	140	119 (532)	-	-	10.1038/srep26532	2016
22	NMC811 (FCG)	TiO2	P	TiCl4/H2O, FBR	?	?	10	92	15	Graphite	3.0-4.35	RT	0.3	0.3	-	?	164	156	144 (422)	5	20	10.1038/srep26532	2016
22	NMC811 (FCG)	TiO2	P	TiCl4/H2O, FBR	?	?	10	92	15	Graphite	3.0-4.35	RT	1	1	-	?	151	135	121 (300)	-	-	10.1038/srep26532	2016
23	NMC811	-	-	-	-	-	-	80	2.5-3.5	Li	2.8-4.5	RT	1	1	-	?	131	-	123 (50)	5	85	10.1016/j.apsusc.2022.156278	2023
23	NMC811	ZrO2	P	Zr(NMe2)4/H2O	5	?	?	80	2.5-3.5	Li	2.8-4.5	RT	1	1	-	?	180	-	165 (50)	5	133	10.1016/j.apsusc.2022.156278	2023
23	NMC811	ZrO2	P	Zr(NMe2)4/H2O	5	?	?	80	2.5-3.5	Li	2.8-4.5	RT	1	1	-	?	178	-	173 (50)	5	156	10.1016/j.apsusc.2022.156278	2023
23	NMC811	ZrO2	P	Zr(NMe2)4/H2O	8	?	?	80	2.5-3.5	Li	2.8-4.5	RT	1	1	-	?	196	-	193 (50)	5	169	10.1016/j.apsusc.2022.156278	2023
24	NMC811	-	-	-	-	-	-	80	~3.5	Li	2.5−4.5	RT	0.5	0.5	-	200	206	~141.2	~105.3 (200)	5	0	10.1021/acsaem.0c01420	2020
24	NMC811	ZrO2	P	TDMAZ/H2O, 200C, FBR	5	?	?	80	~3.5	Li	2.5−4.5	RT	0.5	0.5	-	200	~210	~163.5	~153.7 (132)	-	-	10.1021/acsaem.0c01420	2020
25	NMC900505	-	-	-	-	-	-	90	4-5	Graphite	2.8-4.3	30	2	2	-	?	~197	~110	~98.2 (200)	-	-	10.1002/celc.202400162	2024
25	NMC900505	ZnO	P	DEZ/H2O, 200C	125	?	5-20	90	4-5	Graphite	2.8-4.3	30	2	2	-	?	~206	~144	~129 (200)	-	-	10.1002/celc.202400162	2024
26	NCA0.79-0.16-0.05	-	-	-	-	-	-	92	15	Graphite	3.0-4.4	RT	0.3	0.3	-	?	147	137	93 (300)	5	47	10.1038/srep26532	2016
26	NCA0.79-0.16-0.05	-	-	-	-	-	-	92	15	Graphite	3.0-4.4	RT	1	1	-	?	118	105	77 (300)	-	-	10.1038/srep26532	2016
26	NCA0.79-0.16-0.05	TiO2	P	TiCl4/H2O, FBR	?	?	10	92	15	Graphite	3.0-4.4	RT	0.3	0.3	-	?	147	138	90 (300)	5	0	10.1038/srep26532	2016
26	NCA0.79-0.16-0.05	TiO2	ceo	TiCl4/H2O, FBR	?	?	10	92	15	Graphite	3.0-4.4	RT	1	1	-	?	143	131	95 (300)	-	-	10.1038/srep26532	2016
27	LiNi0.8Co0.15Al0.05O2 (NCA)	-	-	-	-	-	-	80	?	Li	2.5-4.5	25	1	1	-	?	182,98	91,72	-	5	108	10.1039/c6ra21903a	2016
27	LiNi0.8Co0.15Al0.05O2 (NCA)	TiO2	P	TiCl4/H2O, 200C	56	0,36	2	80	?	Li	2.5-4.5	25	1	1	-	?	185,46	135,44	-	5	135	10.1039/c6ra21903a	2016
27	LiNi0.8Co0.15Al0.05O2 (NCA)	TiO2	P	TiCl4/H2O, 200C	138	0,36	5	80	?	Li	2.5-4.5	25	1	1	-	?	189,96	171,36	-	5	155	10.1039/c6ra21903a	2016
27	LiNi0.8Co0.15Al0.05O2 (NCA)	TiO2	P	TiCl4/H2O, 200C	222	0,36	8	80	?	Li	2.5-4.5	25	1	1	-	?	186,9	159,89	-	5	146	10.1039/c6ra21903a	2016
27	LiNi0.8Co0.15Al0.05O2 (NCA)	-	-	-	-	-	-	80	?	Li	2.5-4.5	55	1	1	-	?	204,14	89,76	-	-	-	10.1039/c6ra21903a	2016
27	LiNi0.8Co0.15Al0.05O2 (NCA)	TiO2	P	TiCl4/H2O, 200C	56	0,36	2	80	?	Li	2.5-4.5	55	1	1	-	?	206,99	106,87	-	-	-	10.1039/c6ra21903a	2016
27	LiNi0.8Co0.15Al0.05O2 (NCA)	TiO2	P	TiCl4/H2O, 200C	138	0,36	5	80	?	Li	2.5-4.5	55	1	1	-	?	211,31	154,69	-	-	-	10.1039/c6ra21903a	2016
27	LiNi0.8Co0.15Al0.05O2 (NCA)	TiO2	P	TiCl4/H2O, 200C	222	0,36	8	80	?	Li	2.5-4.5	55	1	1	-	?	207,31	134,17	-	-	-	10.1039/c6ra21903a	2016
LLO
28	LRNCM	-	-	-	-	-	-	80	~2.4	Li	2.0-4.8	25	1	1	-	250	~153	~90	~42 (180)	2	~111	10.1021/acsomega.7b01922	2018
28	LRNCM	-	-	-	-	-	-	80	~2.4	Li	2.0-4.8	25	2	2	-	250	~129	~83	-	-	-	10.1021/acsomega.7b01922	2018
28	LRNCM	-	-	-	-	-	-	80	~2.4	Li	2.0-4.8	55	1	1	-	250	~184	~78	-	2	~108	10.1021/acsomega.7b01922	2018
28	LRNCM	-	-	-	-	-	-	80	~2.4	Li	2.0-4.8	55	2	2	-	250	~127	~52	-	-	-	10.1021/acsomega.7b01922	2018
28	LRNCM	CeO2	P	Ce(iPrCp)3/H2O, 250C, FBR	30	0.5	1.5	80	~2.4	Li	2.0-4.8	25	1	1	-	250	~156	~145	-	2	~122	10.1021/acsomega.7b01922	2018
28	LRNCM	CeO2	P	Ce(iPrCp)3/H2O, 250C, FBR	30	0.5	1.5	80	~2.4	Li	2.0-4.8	25	2	2	-	250	~121	~112	-	-	-	10.1021/acsomega.7b01922	2018
28	LRNCM	CeO2	P	Ce(iPrCp)3/H2O, 250C, FBR	30	0.5	1.5	80	~2.4	Li	2.0-4.8	55	1	1	-	250	~173	~153	-	2	~137	10.1021/acsomega.7b01922	2018
28	LRNCM	CeO2	P	Ce(iPrCp)3/H2O, 250C, FBR	30	0.5	1.5	80	~2.4	Li	2.0-4.8	55	2	2	-	250	~148	~126	-	-	-	10.1021/acsomega.7b01922	2018
28	LRNCM	CeO2	P	Ce(iPrCp)3/H2O, 250C, FBR	50	0.5	2.5	80	~2.4	Li	2.0-4.8	25	1	1	-	250	~166	~156	-	2	~130	10.1021/acsomega.7b01922	2018
28	LRNCM	CeO2	P	Ce(iPrCp)3/H2O, 250C, FBR	50	0.5	2.5	80	~2.4	Li	2.0-4.8	25	2	2	-	250	~135	~124	-	-	-	10.1021/acsomega.7b01922	2018
28	LRNCM	CeO2	P	Ce(iPrCp)3/H2O, 250C, FBR	50	0.5	2.5	80	~2.4	Li	2.0-4.8	55	1	1	-	250	~199	~187	~119 (400)	2	~152	10.1021/acsomega.7b01922	2018
28	LRNCM	CeO2	P	Ce(iPrCp)3/H2O, 250C, FBR	50	0.5	2.5	80	~2.4	Li	2.0-4.8	55	2	2	-	250	~155	~135	-	-	-	10.1021/acsomega.7b01922	2018
28	LRNCM	CeO2	P	Ce(iPrCp)3/H2O, 250C, FBR	70	0.5	3.5	80	~2.4	Li	2.0-4.8	25	1	1	-	250	~161	~149	-	2	~123	10.1021/acsomega.7b01922	2018
28	LRNCM	CeO2	P	Ce(iPrCp)3/H2O, 250C, FBR	70	0.5	3.5	80	~2.4	Li	2.0-4.8	25	2	2	-	250	~124	~118	-	-	-	10.1021/acsomega.7b01922	2018
28	LRNCM	CeO2	P	Ce(iPrCp)3/H2O, 250C, FBR	70	0.5	3.5	80	~2.4	Li	2.0-4.8	55	1	1	-	250	~188	~163	-	2	~136	10.1021/acsomega.7b01922	2018
28	LRNCM	CeO2	P	Ce(iPrCp)3/H2O, 250C, FBR	70	0.5	3.5	80	~2.4	Li	2.0-4.8	55	2	2	-	250	~120	~121	-	-	-	10.1021/acsomega.7b01922	2018
28	LRNCM	CeO2	P	Ce(iPrCp)3/H2O, 250C, FBR	100	0.5	5	80	~2.4	Li	2.0-4.8	25	1	1	-	250	~109	~139	-	2	~108	10.1021/acsomega.7b01922	2018
28	LRNCM	CeO2	P	Ce(iPrCp)3/H2O, 250C, FBR	100	0.5	5	80	~2.4	Li	2.0-4.8	25	2	2	-	250	~108	~98	-	-	-	10.1021/acsomega.7b01922	2018
28	LRNCM	CeO2	P	Ce(iPrCp)3/H2O, 250C, FBR	100	0.5	5	80	~2.4	Li	2.0-4.8	55	1	1	-	250	~150	~144	-	2	~111	10.1021/acsomega.7b01922	2018
28	LRNCM	CeO2	P	Ce(iPrCp)3/H2O, 250C, FBR	100	0.5	5	80	~2.4	Li	2.0-4.8	55	2	2	-	250	~116	~110	-	-	-	10.1021/acsomega.7b01922	2018
29	Li1.2Mn0.54Co0.13Ni0.13O2	-	-	-	-	-	-	80	2,9	Li	2.0-4.6	25	0.333	0.333	-	200	216	-	143(47)	-	-	10.1002/aenm.201300269	2013
29	Li1.2Mn0.54Co0.13Ni0.13O2	TiO2	P	TTIP/H2O, 150C	20	?	0--2(av.1)	80	2,9	Li	2.0-4.6	25	0.333	0.333	-	200	234	-	182(47)	-	-	10.1002/aenm.201300269	2013
29	Li1.2Mn0.54Co0.13Ni0.13O2	-	-	-	-	-	-	80	2,9	Li	2.0-4.6	55	0.333	0.333	-	200	216	-	157(47)	-	-	10.1002/aenm.201300269	2013
29	Li1.2Mn0.54Co0.13Ni0.13O2	TiO2	P	TTIP/H2O, 150C	20	?	0--2(av.1)	80	2,9	Li	2.0-4.6	55	0.333	0.333	-	200	240	-	165(47)	-	-	10.1002/aenm.201300269	2013
29	Li1.2Mn0.54Co0.13Ni0.13O2	-	-	-	-	-	-	80	2,9	MCMB	2.0-4.5	25	0.333	0.333	-	200	213	-	160(47)	-	-	10.1002/aenm.201300269	2013
29	Li1.2Mn0.54Co0.13Ni0.13O2	TiO2	P	TTIP/H2O, 150C	20	?	0--2(av.1)	80	2,9	MCMB	2.0-4.5	25	0.333	0.333	-	200	217	-	169(47)	-	-	10.1002/aenm.201300269	2013
29	Li1.2Mn0.54Co0.13Ni0.13O2	-	-	-	-	-	-	80	2,9	MCMB	2.0-4.5	55	0.333	0.333	-	200	208	-	147(47)	-	-	10.1002/aenm.201300269	2013
29	Li1.2Mn0.54Co0.13Ni0.13O2	TiO2	P	TTIP/H2O, 150C	20	?	0--2(av.1)	80	2,9	MCMB	2.0-4.5	55	0.333	0.333	-	200	218	-	142(47)	-	-	10.1002/aenm.201300269	2013
30	Li1.13Mn0.54Ni0.13Co0.14O2	-	-	-	-	-	-	80	2,4	Li	2.0-4.8	RT	1	1	-	250	153	106	-	5	50	10.1016/j.electacta.2019.06.042	2019
30	Li1.13Mn0.54Ni0.13Co0.14O2	FeOx	P	FeCp2/O2, 450C, FBR	20	?	?	80	2,4	Li	2.0-4.8	RT	1	1	-	250	152	100	-	5	60	10.1016/j.electacta.2019.06.042	2019
30	Li1.13Mn0.54Ni0.13Co0.14O2	FeOx	P	FeCp2/O2, 450C, FBR	40	?	?	80	2,4	Li	2.0-4.8	RT	1	1	-	250	154	122	-	5	86	10.1016/j.electacta.2019.06.042	2019
30	Li1.13Mn0.54Ni0.13Co0.14O2	FeOx	P	FeCp2/O2, 450C, FBR	100	?	?	80	2,4	LI	2.0-4.8	RT	1	1	-	250	126	100	-	5	54	10.1016/j.electacta.2019.06.042	2019
30	Li1.13Mn0.54Ni0.13Co0.14O2	-	-	-	-	-	-	80	2,4	Li	2.0-4.8	55	1	1	-	250	197	51	-	-	-	10.1016/j.electacta.2019.06.042	2019
30	Li1.13Mn0.54Ni0.13Co0.14O2	FeOx	P	FeCp2/O2, 450C, FBR	20	?	?	80	2,4	Li	2.0-4.8	55	1	1	-	250	197	54	-	-	-	10.1016/j.electacta.2019.06.042	2019
30	Li1.13Mn0.54Ni0.13Co0.14O2	FeOx	P	FeCp2/O2, 450C, FBR	40	?	?	80	2,4	Li	2.0-4.8	55	1	1	-	250	195	99	-	-	-	10.1016/j.electacta.2019.06.042	2019
30	Li1.13Mn0.54Ni0.13Co0.14O2	FeOx	P	FeCp2/O2, 450C, FBR	100	?	?	80	2,4	LI	2.0-4.8	55	1	1	-	250	174	63	-	-	-	10.1016/j.electacta.2019.06.042	2019
31	Li1.2Mn0.54Co0.13Ni0.13O2	-	-	-	-	-	-	75	?	Li	2.0-4.8	RT	1	1	-	250	115	66	-	5	5	10.1016/j.jpowsour.2013.08.071	2014
31	Li1.2Mn0.54Co0.13Ni0.13O2	ZnO	P	DEZ/H2O, 120C	2	1,94	0,388	75	?	Li	2.0-4.8	RT	1	1	-	250	135	82	-	-	-	10.1016/j.jpowsour.2013.08.071	2014
31	Li1.2Mn0.54Co0.13Ni0.13O2	ZnO	P	DEZ/H2O, 120C	6	1,94	1,14	75	?	Li	2.0-4.8	RT	1	1	-	250	131	100	-	5	22	10.1016/j.jpowsour.2013.08.071	2014
31	Li1.2Mn0.54Co0.13Ni0.13O2	ZnO	P	DEZ/H2O, 120C	10	1,94	1,94	75	?	Li	2.0-4.8	RT	1	1	-	250	113	52	-	-	-	10.1016/j.jpowsour.2013.08.071	2014
31	Li1.2Mn0.54Co0.13Ni0.13O2	ZrO2	P	ZTB/H2O, 120C	6	1,3	?	75	?	Li	2.0-4.8	RT	1	1	-	250	153	123	-	5	34	10.1016/j.jpowsour.2013.08.071	2014
31	LCO-10@LMNCO	-	-	-	-	-	-	75	?	Li	2.0-4.8	RT	1	1	-	250	187,5	132,8	-	-	-	10.1016/j.jpowsour.2013.08.071	2014
31	LCO-10@LMNCO	ZrO2	P	ZTB/H2O, 120C	6	1,3	?	75	?	Li	2.0-4.8	RT	1	1	-	250	259,8	184	-	10	41	10.1016/j.jpowsour.2013.08.071	2014
31	Li1.2Mn0.54Co0.13Ni0.13O2	-	-	-	-	-	-	75	?	Li	2.0-4.8	RT	-	-	-	250	-	-	-	10	1	10.1016/j.jpowsour.2013.08.071	2014
31	LCO-10@LMNCO	ZrO2	P	ZTB/H2O, 120C	6	1,3	?	75	?	Li	2.0-4.8	RT	-	-	-	250	-	-	-	5	96	10.1016/j.jpowsour.2013.08.071	2014

## Sheet: Post-treated
#	Materials		ALD features					Post-annealing			Electrochemical cycling conditions									Capacity at cycle (long-term), mAh/g			Ratecap test		Source data
	Electrode material	Coating material	Type of coating (P/E)	ALD conditions: precursors, T, reactor type	# ALD cycles	Growth rate, Å/cycle	Thickness, nm	Atmosphere	Temperature, °C	Duration, hours	Active material, wt%	Active material mass loading, mg/cm2	Negative electrode	Potential range, V	Temperature, °C	Charge current rate, C-units	Discharge current rate, C-units	Measurements in CCCV mode	Current at 1C, mA/g	1st	100th (if available)	largest (number of cycles), "-" if exactly 100	max C-rate, C-units (C-charge, D-discharge)	1st cycle capacity	Ref (DOI)	Year
LCO
1	LCO	-	-	-	-	-	-	Air	400	14	20	?	Li	3.3-4.3	30	?	?	-	?	128	?	90 (25)	-	-	10.1149/2.085207jes	2012
1	LCO	Al2O3	P	TMA/H2O, RR	2	?	?	Air	400	14	20	?	Li	3.3-4.3	30	?	?	-	?	122	?	111 (25)	-	-	10.1149/2.085207jes	2012
1	LCO	Al2O3	P	TMA/H2O, RR	4	?	?	Air	400	14	20	?	Li	3.3-4.3	30	?	?	-	?	118	?	106 (25)	-	-	10.1149/2.085207jes	2012
1	LCO	Al2O3	P	TMA/H2O, RR	6	?	?	Air	400	14	20	?	Li	3.3-4.3	30	?	?	-	?	?	?	?	-	-	10.1149/2.085207jes	2012
1	LCO	Al2O3	P	TMA/H2O, RR	10	?	?	Air	400	14	20	?	Li	3.3-4.3	30	?	?	-	?	?	?	?	-	-	10.1149/2.085207jes	2012
Spinel-type materials
2	LMO	-	-	-	-	-	-	-	-	-	80	?	Li	3.4-4.5	55	5	5	-	120	114.6	58.8	-	-	-	10.1016/j.nanoen.2013.03.005	2013
2	LMO	ZrO2	P	Zr(O(CH3)3)4/H2O, 120C	6	~2.0	1.2	Air	450	3	80	?	Li	3.4-4.5	55	5	5	-	120	127	90.3	-	-	-	10.1016/j.nanoen.2013.03.005	2013
3	LMO	-	-	-	-	-	-	-	-	-	80	4.5	Li	3.5-4.5	RT	1	1		148	129.6	~116	107.7 (250)	3	~83.8	10.1021/acsenergylett.3c01560	2023
3	LMO	MgO	P	Mg(C5H5)2/H2O, 150	2	?	?	Air	300	3	80	4.5	Li	3.5-4.5	RT	1	1		148	~126.5	~118	~111.5 (250)	3	~98.1	10.1021/acsenergylett.3c01560	2023
3	LMO	MgO	P	Mg(C5H5)2/H2O, 150	5	?	?	Air	300	3	80	4.5	Li	3.5-4.5	RT	1	1		148	127.7	~124.1	121.4 (250)	3	~115.5	10.1021/acsenergylett.3c01560	2023
3	LMO	MgO	P	Mg(C5H5)2/H2O, 150	10	?	?	Air	300	3	80	4.5	Li	3.5-4.5	RT	1	1		148	120	~120.4	118.3 (250)	3	~114.1	10.1021/acsenergylett.3c01560	2023
4	LNMO	-	-	-	-	-	-	Air	650	4	80	~3.5	Li	3.5-5.0	RT	1	1	-	147	~97.9	~94.1	~55.8 (1000)	5	~14.7	10.1021/acs.jpcc.1c00225	2021
4	LNMO	FeOx	P	FeCp2/O2, 450C, FBR	40	?	?	Air	650	4	80	~3.5	Li	3.5-5.0	RT	1	1	-	147	114.4	~112.1	99.99 (1000)	5	~74.2	10.1021/acs.jpcc.1c00225	2021
4	LNMO	FeOx	P	FeCp2/O2, 450C, FBR	40	?	?	Air	700	4	80	~3.5	LI	3.5-5.0	RT	1	1	-	147	118.2	~109.1	91.1 (1000)	5	~63.5	10.1021/acs.jpcc.1c00225	2021
4	LNMO	-	-	-	-	-	-	Air	650	4	80	~3.5	LTO	2.0-3.5	RT	1	1	-	147	~99.8	~86.9	~74.4 (200)	-	-	10.1021/acs.jpcc.1c00225	2021
4	LNMO	FeOx	P	FeCp2/O2, 450C, FBR	40	?	?	Air	650	4	80	~3.5	LTO	2.0-3.5	RT	1	1	-	147	~114.8	~113.6	~112 (200)	-	-	10.1021/acs.jpcc.1c00225	2021
4	LNMO	FeOx	P	FeCp2/O2, 450C, FBR	40	?	?	Air	700	4	80	~3.5	LTO	2.0-3.5	RT	1	1	-	147	~116.6	~114.3	~99.1 (200)	-	-	10.1021/acs.jpcc.1c00225	2021
5	LNMO	-	-	-	-	-	-	-	-	-	80	?	Li	3.5-5.0	25	1	1	-	147	~80.3	~77.5	~53 (500)	5	0	10.1016/j.electacta.2020.135951	2020
5	LNMO	-	-	-	-	-	-	-	-	-	80	?	Li	3.5-5.0	55	1	1	-	147	~101.1	~61.6	~26.9 (500)	5	0	10.1016/j.electacta.2020.135951	2020
5	LNMO	-	-	-	-	-	-	Air	700	4	80	?	Li	3.5-5.0	25	1	1	-	147	~90.2	~86.1	~78.1 (500)	5	~35.4	10.1016/j.electacta.2020.135951	2020
5	LNMO	-	-	-	-	-	-	Air	700	4	80	?	Li	3.5-5.0	55	1	1	-	147	~110.4	~99.4	~88.1( 500)	5	~10.3	10.1016/j.electacta.2020.135951	2020
5	LNMO	FeOx	P	FeCp2/O2, 450C, FBR	50	-	-	Air	700	4	80	?	Li	3.5-5.0	25	1	1	-	147	~105.7	~101.7	~98.6 (500)	5	~65	10.1016/j.electacta.2020.135951	2020
5	LNMO	FeOx	P	FeCp2/O2, 450C, FBR	50	-	-	Air	700	4	80	?	Li	3.5-5.0	55	1	1	-	147	~122	~113.2	~104.4 (500)	5	~73	10.1016/j.electacta.2020.135951	2020
5	LNMO	FeOx	P	FeCp2/O2, 450C, FBR	50	-	-	Air	700	4	80	?	Li	3.5-5.0	25	1	1	-	147	~96.4	~92.7	~85.8 (500)	5	~42.1	10.1016/j.electacta.2020.135951	2020
5	LNMO	FeOx	P	FeCp2/O2, 450C, FBR	50	-	-	Air	700	4	80	?	Li	3.5-5.0	55	1	1	-	147	~113.7	~106.9	~94.6 (500)	5	~48.6	10.1016/j.electacta.2020.135951	2020
Ni-rich NMC and NCA
6	NMC111	-	-	-	-	-	-	-	-	-	90	?	Li	3.0-4.5	25	1	1	+	160	171	155	154(108)	16	30	10.1016/j.jpowsour.2013.12.119	2014
6	NMC111	Al2O3	P	TMA/H2O, 180C, rotary	4	1,3	?	Air	300	12	90	?	Li	3.0-4.5	25	1	1	+	160	166	159	159(108)	16	43	10.1016/j.jpowsour.2013.12.119	2014
6	NMC111	-	-	-	-	-	-	-	-	-	90	?	Li	3.0-4.5	55	1	1	+	160	170	-	25(68)	-	-	10.1016/j.jpowsour.2013.12.119	2014
6	NMC111	Al2O3	P	TMA/H2O, 180C, rotary	4	1,3	?	Air	300	12	90	?	Li	3.0-4.5	55	1	1	+	160	171	-	157(68)	-	-	10.1016/j.jpowsour.2013.12.119	2014
6	NMC111	-	-	-	-	-	-	-	-	-	90	?	Li	3.0-4.3	55	1	1	+	160	149	-	54(68)	-	-	10.1016/j.jpowsour.2013.12.119	2014
6	NMC111	Al2O3	P	TMA/H2O, 180C, rotary	4	1,3	?	Air	300	12	90	?	Li	3.0-4.3	55	1	1	+	160	149	-	142(68)	-	-	10.1016/j.jpowsour.2013.12.119	2014
7	NMC532	-	-	-	-	-	-	-	-	-	66	?	Li	3.0-4.3	RT	5	5	-	138	144	71	-	-	-	10.1016/j.jpowsour.2017.08.076	2017
7	NMC532	Al2O3	P	TMA/H2O, 100C	5	1	?	Air	300	2	66	?	Li	3.0-4.3	RT	5	5	-	138	141	70	-	-	-	10.1016/j.jpowsour.2017.08.076	2017
7	NMC532	Al2O3	P	TMA/H2O, 100C	5	1	?	Air	500	2	66	?	Li	3.0-4.3	RT	5	5	-	138	143	78	-	-	-	10.1016/j.jpowsour.2017.08.076	2017
7	NMC532	Al2O3	P	TMA/H2O, 100C	5	1	?	Air	700	2	66	?	Li	3.0-4.3	RT	5	5	-	138	139	77	-	-	-	10.1016/j.jpowsour.2017.08.076	2017
7	NMC532	-	-	-	-	-	-	-	-	-	66	?	Li	3.0-4.3	RT	0,2	0,2	-	138	176	161	-	-	-	10.1016/j.jpowsour.2017.08.076	2017
7	NMC532	Al2O3	P	TMA/H2O, 100C	5	1	?	Air	300	2	66	?	Li	3.0-4.3	RT	0,2	0,2	-	138	174	163	-	-	-	10.1016/j.jpowsour.2017.08.076	2017
7	NMC532	Al2O3	P	TMA/H2O, 100C	5	1	?	Air	500	2	66	?	Li	3.0-4.3	RT	0,2	0,2	-	138	176	163	-	-	-	10.1016/j.jpowsour.2017.08.076	2017
7	NMC532	Al2O3	P	TMA/H2O, 100C	5	1	?	Air	700	2	66	?	Li	3.0-4.3	RT	0,2	0,2	-	138	174	163	-	-	-	10.1016/j.jpowsour.2017.08.076	2017
8	NMC532	-	-	-	-	-	-	-	-	-	90	?	Li	3.0-4.5	RT	0,333	0,333	+	?	184	-	147(80)	-	-	10.1149/2.0681915jes	2019
8	NMC532	Al2O3	P	TMA/H2O, 180C	2	?	?	Air	800	8	90	?	Li	3.0-4.5	RT	0,333	0,333	+	?	174	-	161	-	-	10.1149/2.0681915jes	2019
8	NMC532	Al2O3	P	TMA/H2O, 180C	8	?	?	Air	800	8	90	?	Li	3.0-4.5	RT	0,333	0,333	+	?	172	-	163	-	-	10.1149/2.0681915jes	2019
9	NMC532	-	-	-	-	-	-	-	-	-	80	4	Li	3.0-4.55	RT	1	1	+	185	178	23	17(200)	10	1	10.1016/j.apsusc.2022.155162	2023
9	NMC532	Al2O3	P	TMA/H2O, 180C	4	1	0,4	+	+	+	80	4	Li	3.0-4.55	RT	1	1	+	185	175	163	150(200)	10	155	10.1016/j.apsusc.2022.155162	2023
9	NMC532	-	-	-	-	-	-	-	-	-	80	4	Li	3.0-4.5	RT	0,5	0,5	+	185	175	154	52(286)	-	-	10.1016/j.apsusc.2022.155162	2023
9	NMC532	Al2O3	P	TMA/H2O, 180C	4	1	0,4	+	+	+	80	4	Li	3.0-4.5	RT	0,5	0,5	+	185	180	176	163(800)	-	-	10.1016/j.apsusc.2022.155162	2023
10	NMC622	-	-	-	-	-	-	-	-	-	80	2.6-3.4	Li	3.0-4.5	RT	1	1	-	180	140	94	49(300)	2	135	10.3390/coatings12010084	2022
10	NMC622	Al2O3	P	TMA/H2O, 150C, FBR	2	1,3	?	Air	500	3	80	2.6-3.4	Li	3.0-4.5	RT	1	1	-	180	139	130	128(300)	2	135	10.3390/coatings12010084	2022
10	NMC622	Al2O3	P	TMA/H2O, 150C, FBR	4	1,3	?	Air	500	3	80	2.6-3.4	Li	3.0-4.5	RT	-	-	-	180	-	-	-	2	95	10.3390/coatings12010084	2022
10	NMC622	Al2O3	P	TMA/H2O, 150C, FBR	8	1,3	?	Air	500	3	80	2.6-3.4	Li	3.0-4.5	RT	-	-	-	180	-	-	-	2	36	10.3390/coatings12010084	2022
11	NMC622	-	-	-	-	-	-	-	-	-	80	?	Li	2.75-4.3	RT	1	1	-	180	165	155	-	5	128	10.3390/inorganics10080111	2022
11	NMC622	WO3	P	WCl6/????	?	?	?	Oxygen	500	6	80	?	Li	2.75-4.3	RT	1	1	-	180	158	154	-	5	135	10.3390/inorganics10080111	2022
11	NMC622	WO3	P	WCl6/????	?	?	?	-	-	-	80	?	Li	2.75-4.3	55	1	1	-	180	179	156	124(300)	-	-	10.3390/inorganics10080111	2022
11	NMC622	WO3	P	WCl6/????	?	?	?	Oxygen	500	6	80	?	Li	2.75-4.3	55	1	1	-	180	173	166	151(300)	-	-	10.3390/inorganics10080111	2022
12	NMC622	-	-	-	-	-	-	-	-	-	90	2.5-3.5	Li	2.8-4.5	RT	1	1	-	180	169	149	140 (150)	5	121	10.1021/acs.nanolett.0c03778	2020
12	NMC622	ZrO2	P	Zr(NMe2)4/H2O, 150C	5	2,4	1,2	?	300	?	90	2.5-3.5	Li	2.8-4.5	RT	1	1	-	180	171	167	166 (150)	5	139	10.1021/acs.nanolett.0c03778	2020
12	NMC622	ZrO2	P	Zr(NMe2)4/H2O, 150C	5	2,4	1,2	?	500	?	90	2.5-3.5	Li	2.8-4.5	RT	1	1	-	180	172	170	169 (150)	5	151	10.1021/acs.nanolett.0c03778	2020
12	NMC622	ZrO2	P	Zr(NMe2)4/H2O, 150C	5	2,4	1,2	?	700	?	90	2.5-3.5	Li	2.8-4.5	RT	1	1	-	180	169	160	156 (150)	5	138	10.1021/acs.nanolett.0c03778	2020
12	NMC622	-	-	-	-	-	-	-	-	-	90	2.5-3.5	Li	2.8-4.5	RT	5	5	-	180	152	141	122 (250)	-	-	10.1021/acs.nanolett.0c03778	2020
12	NMC622	ZrO2	P	Zr(NMe2)4/H2O, 150C	5	2,4	1,2	?	500	?	90	2.5-3.5	Li	2.8-4.5	RT	5	5	-	180	156	151	147(250)	-	-	10.1021/acs.nanolett.0c03778	2020
13	NMC622	-	-	-	-	-	-	Argon	600	?	80	?	Li	3.0-4.5	25	1	1	-	200	162	132	-	8	96	10.1016/j.jallcom.2019.05.330	2019
13	NMC622	Al2O3	P	TMA/H2O, 200C	20	?	2,45	Argon	600	?	80	?	Li	3.0-4.5	25	1	1	-	200	169	147	-	8	115	10.1016/j.jallcom.2019.05.330	2019
13	NMC622	-	-	-	-	-	-	Argon	600	?	80	?	Li	3.0-4.5	55	0,5	0,5	-	200	195	141	-	-	-	10.1016/j.jallcom.2019.05.330	2019
13	NMC622	Al2O3	P	TMA/H2O, 200C	20	?	2,45	Argon	600	?	80	?	Li	3.0-4.5	55	0,5	0,5	-	200	203	168	-	-	-	10.1016/j.jallcom.2019.05.330	2019
14	NMC811	-	-	-	-	-	-	Oxygen	750	10	80	~3.5	Li	2.5−4.5	RT	0.5	0.5	-	200	206	~141.2	~105.3 (200)	5	0	10.1021/acsaem.0c01420	2020
14	NMC811	Al2O3	P	TMA/H2O, 177C, FBR	10	?	?	Oxygen	750	10	80	~3.5	Li	2.5−4.5	RT	0.5	0.5	-	200	~210.8	~144.3	~112.3 (200)	5	0	10.1021/acsaem.0c01420	2020
14	NMC811	Al2O3	P	TMA/H2O, 177C, FBR	15	?	?	Oxygen	750	10	80	~3.5	Li	2.5−4.5	RT	0.5	0.5	-	200	195	~173.7	~154.4 (200)	5	~78.9	10.1021/acsaem.0c01420	2020
14	NMC811	Al2O3	P	TMA/H2O, 177C, FBR	25	?	~3	Oxygen	750	10	80	~3.5	Li	2.5−4.5	RT	0.5	0.5	-	200	~190	~148.8	~118.3 (200)	5	~54.4	10.1021/acsaem.0c01420	2020
14	NMC811	ZrO2	P	TDMAZ/H2O, 200C, FBR	10	?	?	Oxygen	750	10	80	~3.5	Li	2.5−4.5	RT	0.5	0.5	-	200	~205.4	~141.4	~114.3 (200)	5	~35.4	10.1021/acsaem.0c01420	2020
14	NMC811	ZrO2	P	TDMAZ/H2O, 200C, FBR	20	?	?	Oxygen	750	10	80	~3.5	Li	2.5−4.5	RT	0.5	0.5	-	200	203	~173	~152.4 (200)	5	~95	10.1021/acsaem.0c01420	2020
14	NMC811	ZrO2	P	TDMAZ/H2O, 200C, FBR	30	?	~4.5	Oxygen	750	10	80	~3.5	Li	2.5−4.5	RT	0.5	0.5	-	200	~191.6	~156.2	~135.2 (200)	5	~58.6	10.1021/acsaem.0c01420	2020
15	LiNi0.83Co0.11Mn0.06O2	-	-	-	-	-	-	-	-	-	80	?	Li	2.8-4.5	RT	1	1	-	200	184	164	151(150)	5	122	10.1021/acs.nanolett.3c01648	2023
15	LiNi0.83Co0.11Mn0.06O2	Al2O3 (Li5AlO4)	P	TMA, H2O, 115C	125	?	?	Post-lithiation	Post-lithiation	Post-lithiation	80	?	Li	2.8-4.5	RT	1	1	-	200	184	177	176(150)	5	153	10.1021/acs.nanolett.3c01648	2023
LLO
16	Li1.08Ni0.22Co0.22Mn0.45O2	-	-	-	-	-	-	-	-	-	80	4	Li	2.0-4.6	RT	1	1	-	250	186	167	159(200)	3	153	10.1002/adfm.202302236	2023
16	Li1.08Ni0.22Co0.22Mn0.45O2	Al2O3	P	TMA/H2O, 180C, rotary	?	?	?	Air	600	8	80	4	Li	2.0-4.6	RT	1	1	-	250	182	177	171(200)	3	156	10.1002/adfm.202302236	2023
17	Li1.13Mn0.54Ni0.13Co0.14O2	-	-	-	-	-	-	-	-	-	80	2,4	Li	2.0-4.8	RT	1	1	-	250	153	106	-	5	50	10.1016/j.electacta.2019.06.042	2019
17	Li1.13Mn0.54Ni0.13Co0.14O2	-	-	-	-	-	-	Air	700	24	80	2,4	Li	2.0-4.8	RT	1	1	-	250	154	106	-	5	49	10.1016/j.electacta.2019.06.042	2019
17	Li1.13Mn0.54Ni0.13Co0.14O2	FeOx	P	FeCp2/O2, 450C, FBR	20	?	?	Air	700	24	80	2,4	Li	2.0-4.8	RT	1	1	-	250	153	118	-	5	61	10.1016/j.electacta.2019.06.042	2019
17	Li1.13Mn0.54Ni0.13Co0.14O2	FeOx	P	FeCp2/O2, 450C, FBR	40	?	?	Air	700	24	80	2,4	Li	2.0-4.8	RT	1	1	-	250	159	136	-	5	84	10.1016/j.electacta.2019.06.042	2019
17	Li1.13Mn0.54Ni0.13Co0.14O2	FeOx	P	FeCp2/O2, 450C, FBR	100	?	?	Air	700	24	80	2,4	LI	2.0-4.8	RT	1	1	-	250	125	108	-	5	57	10.1016/j.electacta.2019.06.042	2019
17	Li1.13Mn0.54Ni0.13Co0.14O2	-	-	-	-	-	-	-	-	-	80	2,4	Li	2.0-4.8	55	1	1	-	250	197	51	-	-	-	10.1016/j.electacta.2019.06.042	2019
17	Li1.13Mn0.54Ni0.13Co0.14O2	-	-	-	-	-	-	Air	700	24	80	2,4	Li	2.0-4.8	55	1	1	-	250	198	52	-	-	-	10.1016/j.electacta.2019.06.042	2019
17	Li1.13Mn0.54Ni0.13Co0.14O2	FeOx	P	FeCp2/O2, 450C, FBR	20	?	?	Air	700	24	80	2,4	Li	2.0-4.8	55	1	1	-	250	193	81	-	-	-	10.1016/j.electacta.2019.06.042	2019
17	Li1.13Mn0.54Ni0.13Co0.14O2	FeOx	P	FeCp2/O2, 450C, FBR	40	?	?	Air	700	24	80	2,4	Li	2.0-4.8	55	1	1	-	250	221	161	-	-	-	10.1016/j.electacta.2019.06.042	2019
17	Li1.13Mn0.54Ni0.13Co0.14O2	FeOx	P	FeCp2/O2, 450C, FBR	100	?	?	Air	700	24	80	2,4	LI	2.0-4.8	55	1	1	-	250	185	139	-	-	-	10.1016/j.electacta.2019.06.042	2019
18	Li1.2Mn0.54Ni0.13Co0.13O2	-	-	-	-	-	-	Argon	800	0.5	80	2	Li	2.0-4.8	RT	0,5	0,5	-	250	205	175	-	5	102	10.1016/j.jallcom.2016.10.045	2017
18	Li1.2Mn0.54Ni0.13Co0.13O2	ZnO	P	ZnEt2/H2O, 150C	10	?	?	Argon	800	0.5	80	2	Li	2.0-4.8	RT	0,5	0,5	-	250	208	197	-	5	135	10.1016/j.jallcom.2016.10.045	2017
18	Li1.2Mn0.54Ni0.13Co0.13O2	ZnO	P	ZnEt2/H2O, 150C	20	?	3,29	Argon	800	0.5	80	2	Li	2.0-4.8	RT	0,5	0,5	-	250	211	206	-	5	150	10.1016/j.jallcom.2016.10.045	2017
18	Li1.2Mn0.54Ni0.13Co0.13O2	ZnO	P	ZnEt2/H2O, 150C	30	?	?	Argon	800	0.5	80	2	Li	2.0-4.8	RT	0,5	0,5	-	250	206	193	-	5	119	10.1016/j.jallcom.2016.10.045	2017

## Sheet: Lithium(sodium)-metal oxide
#	Materials		ALD features					Electrochemical cycling conditions									Capacity at cycle (long-term), mAh/g			Ratecap test		Source data
	Electrode material	Coating material	Type of coating (P/E)	ALD conditions: precursors, T, reactor type	# ALD cycles	Growth rate, Å/cycle	Thickness, nm	Active material, wt%	Active material mass loading, mg/cm2	Negative electrode	Potential range, V	Temperature, °C	Charge current rate, C-units	Discharge current rate, C-units	Measurements in CCCV mode	Current at 1C, mA/g	1st	100th (if available)	largest (number of cycles), "-" if exactly 100	max C-rate, C-units (C-charge, D-discharge)	1st cycle capacity	Ref (DOI)	Year
Ni-rich NMC
1	NMC622	-	-	-	-	-	-	86	10	Li	3.0-4.5	RT	3	3	-	180	154	-	40(97)	7	32	10.1039/d1dt03600a	2022
1	NMC622	LixZryOz	P	LTB/H2O/TDMA-Zr, 225C	10	1,1	?	86	10	Li	3.0-4.5	RT	3	3	-	180	156	-	45(97)	7	23	10.1039/d1dt03600a	2022
1	NMC622	LixZryOz	P	LTB/H2O/TDMA-Zr, 225C	20	1,1	?	86	10	Li	3.0-4.5	RT	3	3	-	180	154	-	104(97)	7	44	10.1039/d1dt03600a	2022
1	NMC622	LixZryOz	P	LTB/H2O/TDMA-Zr, 225C	40	1,1	?	86	10	Li	3.0-4.5	RT	3	3	-	180	156	-	68(97)	7	18	10.1039/d1dt03600a	2022
1	NMC622	LixZryOz	P	LTB/H2O/TDMA-Zr, 225C	60	1,1	?	86	10	Li	3.0-4.5	RT	3	3	-	180	147	-	23(97)	7	15	10.1039/d1dt03600a	2022
2	NMC811	-	-	-	-	-	-	80	3	Li	2.8-4.3	30	0.5	1	+	190	182	130	101(199)	4	150	10.1016/j.mtener.2022.101207	2023
2	NMC811	LixSnyOz	P	TDMASn/H2O/O3/Li(t-BuO), 180C	100	?	4--7	80	3	Li	2.8-4.3	30	0.5	1	+	190	178	151	136(199)	4	167	10.1016/j.mtener.2022.101207	2023
2	NMC811	-	-	-	-	-	-	80	3	Li	2.8-4.3	30	0.5	1	+	190	174	123	101(198)	-	-	10.1016/j.mtener.2022.101207	2023
2	NMC811	LixSnyOz	P	TDMASn/H2O/O3/Li(t-BuO), 180C	100	?	4--7	80	3	Li	2.8-4.3	30	0.5	1	+	190	167	159	145(198)	-	-	10.1016/j.mtener.2022.101207	2023
2	NMC811	-	-	-	-	-	-	80	3	Li	2.8-4.3	55	0.5	1	+	190	181	142	114(298)	5	132	10.1016/j.mtener.2022.101207	2023
2	NMC811	LixSnyOz	P	TDMASn/H2O/O3/Li(t-BuO), 180C	100	?	4--7	80	3	Li	2.8-4.3	55	0.5	1	+	190	200	175	130(298)	5	167	10.1016/j.mtener.2022.101207	2023
2	NMC811	-	-	-	-	-	-	80	3	Graphite	3.0-4.2	30	0.5	1	+	190	180,5	149	104(500)	-	-	10.1016/j.mtener.2022.101207	2023
2	NMC811	LixSnyOz	P	TDMASn/H2O/O3/Li(t-BuO), 180C	100	?	4--7	80	3	Graphite	3.0-4.2	30	0.5	1	+	190	179,8	166	135(500)	-	-	10.1016/j.mtener.2022.101207	2023
3	LNO	-	-	-	-	-	-	?	8.28–9.11	LiIn	2.6-4.3	35	0.2	0.2	-	180	159.39	~116	89.6 (200)	5	0	10.1038/s41565-023-01519-8	2024
3	LNO	LAZO	P	LiOtBu/TMA/DEZ/H2O	50	?	?	?	8.28–9.11	LiIn	2.6-4.3	35	0.2	0.2	-	180	~200.3	~156.4	-	-	-	10.1038/s41565-023-01519-8	2024
3	LNO	LAZO	P	LiOtBu/TMA/DEZ/H2O	100	?	~4	?	8.28–9.11	LiIn	2.6-4.3	35	0.2	0.2	-	180	~203.08	~182.4	168.8 (200)	5	29.49	10.1038/s41565-023-01519-8	2024
3	LNO	LAZO	P	LiOtBu/TMA/DEZ/H2O	150	?	?	?	8.28–9.11	LiIn	2.6-4.3	35	0.2	0.2	-	180	~191.8	~162	-	-	-	10.1038/s41565-023-01519-8	2023
LLO
4	Li1.13Mn0.577Ni0.256Co0.097O2	-	-	-	-	-	-	80	2,2	Li	2.0-4.6	RT	1	1	-	200	196	152	125(199)	5	123	10.1002/adma.201906070	2020
4	Li1.13Mn0.577Ni0.256Co0.097O2	LiTaO3	P	Li(t-BuO)/Ta(OEt)5/H2O, 235C	2	?	?	80	2,2	Li	2.0-4.6	RT	1	1	-	200	205	176	151(199)	-	-	10.1002/adma.201906070	2020
4	Li1.13Mn0.577Ni0.256Co0.097O2	LiTaO3	P	Li(t-BuO)/Ta(OEt)5/H2O, 235C	5	?	?	80	2,2	Li	2.0-4.6	RT	1	1	-	200	213	188	172(199)	-	-	10.1002/adma.201906070	2020
4	Li1.13Mn0.577Ni0.256Co0.097O2	LiTaO3	P	Li(t-BuO)/Ta(OEt)5/H2O, 235C	10	?	3	80	2,2	Li	2.0-4.6	RT	1	1	-	200	219	206	190(199)	5	153	10.1002/adma.201906070	2020
4	Li1.13Mn0.577Ni0.256Co0.097O2	LiTaO3	P	Li(t-BuO)/Ta(OEt)5/H2O, 235C	20	?	?	80	2,2	Li	2.0-4.6	RT	1	1	-	200	183	166	151(199)	-	-	10.1002/adma.201906070	2020
4	Li1.13Mn0.577Ni0.256Co0.097O2	-	-	-	-	-	-	80	2,2	Graphite	2.0-4.55	RT	1	1	-	200	183	167	104(349)	-	-	10.1002/adma.201906070	2020
4	Li1.13Mn0.577Ni0.256Co0.097O2	LiTaO3	P	Li(t-BuO)/Ta(OEt)5/H2O, 235C	10	?	3	80	2,2	Graphite	2.0-4.55	RT	1	1	-	200	205	192	160(349)	-	-	10.1002/adma.201906070	2020
4	Li1.13Mn0.577Ni0.256Co0.097O2	-	-	-	-	-	-	80	2,2	Li	2.0-4.6	55	1	1	-	200	223	-	184(59)	-	-	10.1002/adma.201906070	2020
4	Li1.13Mn0.577Ni0.256Co0.097O2	LiTaO3	P	Li(t-BuO)/Ta(OEt)5/H2O, 235C	10	?	3	80	2,2	Li	2.0-4.6	55	1	1	-	200	245	-	222(59)	-	-	10.1002/adma.201906070	2020
5	Li1.2Mn0.56Ni0.16Co0.08O2	-	-	-	-	-	-	?	4-5	Li	2.0-4.7	25	1	1	-	250	~169.7	~159.1	137.8 (300)	5	?	10.1039/D2TA07316A	2022
5	Li1.2Mn0.56Ni0.16Co0.08O2	-	-	-	-	-	-	?	4-5	Li	2.0-4.8	60	1	1	-	250	~261.5	-	68 (95)	5	157.2	10.1039/D2TA07316A	2022
5	Li1.2Mn0.56Ni0.16Co0.08O2	Li2SiO3	P	LiOtBu/TEOS/H2O, 235C	3	?	?	?	4-5	Li	2.0-4.7	25	1	1	-	250	?	?	143.9 (300)	5	?	10.1039/D2TA07316A	2022
5	Li1.2Mn0.56Ni0.16Co0.08O2	Li2SiO3	P	LiOtBu/TEOS/H2O, 235C	5	?	?	?	4-5	Li	2.0-4.7	25	1	1	-	250	~192.7	~175.9	150.2 (300)	5	?	10.1039/D2TA07316A	2022
5	Li1.2Mn0.56Ni0.16Co0.08O2	Li2SiO3	P	LiOtBu/TEOS/H2O, 235C	10	?	2.5	?	4-5	Li	2.0-4.7	25	1	1	-	250	~180.5	~165.9	148.7 (300)	5	~109.9	10.1039/D2TA07316A	2022
5	Li1.2Mn0.56Ni0.16Co0.08O2	Li2SiO3	P	LiOtBu/TEOS/H2O, 235C	10	?	2.5	?	4-5	Li	2.0-4.8	60	1	1	-	250	~287	-	246 (95)	5	188.7	10.1039/D2TA07316A	2022
5	Li1.2Mn0.56Ni0.16Co0.08O2	Li2SiO3	P	LiOtBu/TEOS/H2O, 235C	15	?	?	?	4-5	Li	2.0-4.7	25	1	1	-	250	~184.1	~165.7	138.4 (300)	5	~102.2	10.1039/D2TA07316A	2022
6	0.33Li2MnO3·0.67Li(Ni0.4Co0.2Mn0.4)O2	-	-	-	-	-	-	92,5	6--7	Li	2.0-4.7	30	1	1	-	250	221	156	63(392)	3	~175	10.1002/adfm.202008083	2021
6	0.33Li2MnO3·0.67Li(Ni0.4Co0.2Mn0.4)O2	Li5AlO4	P	TMA/O3/LTB, 150C, FBR	20	?	2	92,5	6--7	Li	2.0-4.7	30	1	1	-	250	219	209	100(392)	3	180	10.1002/adfm.202008083	2021
6	0.33Li2MnO3·0.67Li(Ni0.4Co0.2Mn0.4)O2	Na5AlO4	P	TMA/O3/NTB, 240C, FBR	20	?	2	92,5	6--7	Li	2.0-4.7	30	1	1	-	250	213	212	129(392)	3	~175	10.1002/adfm.202008083	2021

## Sheet: Fluorides
#	Materials		ALD features					Electrochemical cycling conditions									Capacity at cycle (long-term), mAh/g			Ratecap test		Source data
	Electrode material	Coating material	Type of coating (P/E)	ALD conditions: precursors, T, reactor type	# ALD cycles	Growth rate, Å/cycle	Thickness, nm	Active material, wt%	Active material mass loading, mg/cm2	Negative electrode	Potential range, V	Temperature, °C	Charge current rate, C-units	Discharge current rate, C-units	Measurements in CCCV mode	Current at 1C, mA/g	1st	100th (if available)	largest (number of cycles), "-" if exactly 100	max C-rate, C-units (C-charge, D-discharge)	1st cycle capacity	Ref (DOI)	Year
Spinel-type materials
1	LNMO	-	-	-	-	-	-	80	9-13 mg/ 1.23 cm2	Li	3.5-4.85	RT	0.1 mA/cm2	0.1 mA/cm2	-	?	~129.4	~17.9	-	1.6	0	10.1021/acsaem.8b01048	2018
1	LNMO	AlF3	P	TMA/O3, Hfac/O3, 150C	2	?	2.4	80	9-13 mg/ 1.23 cm2	Li	3.5-4.85	RT	0.1 mA/cm2	0.1 mA/cm2	-	?	~125.6	~103.4	-	1.6	~24.7	10.1021/acsaem.8b01048	2018
1	LNMO	-	-	-	-	-	-	86	20	Gr	4.0-4.85	45	0.2	0.2	-	?	~142.6	~112.2	~88.6 (120)	-	-	10.1021/acsaem.8b01048	2018
1	LNMO	AlF3	P	TMA/O3, Hfac/O3, 150C	2	?	2.4	86	20	Gr	4.0-4.85	45	0.2	0.2	-	?	~135.8	~132	~93.2 (150)	-	-	10.1021/acsaem.8b01048	2018
1	LNMO	AlF3	P	TMA/O3, Hfac/O3, 150C	4	?	4.6	86	20	Gr	4.0-4.85	45	0.2	0.2	-	?	~134.6	~124.6	~103.8 (120)	-	-	10.1021/acsaem.8b01048	2018
1	LNMO	AlF3	P	TMA/O3, Hfac/O3, 240C	2	?	2.4	86	20	Gr	4.0-4.85	45	0.2	0.2	-	?	~129	~132.5	~97.3 (150)	-	-	10.1021/acsaem.8b01048	2018
2	LNMO	-	-	-	-	-	-	80	6.5-8.0	Li	3.5-4.95	25	0.1	0.1	-	0.1 mA/cm2	~126.9	~87	~47.8 (140)	-	-	10.1002/cnma.201500149	2015
2	LNMO	-	-	-	-	-	-	80	6.5-8.0	Li	3.5-4.95	45	0.1	0.1	-	0.1 mA/cm2	~128.2	-	~17.4 (15)	-	-	10.1002/cnma.201500149	2015
2	LNMO	MgF2	P	Mg[EtCp]2/O3, Hfac/O3, 275C, FBR	12	0.48	0.576	80	6.5-8.0	Li	3.5-4.95	25	0.1	0.1	-	0.1 mA/cm2	~82.1	~81.6	~62.2 (140)	-	-	10.1002/cnma.201500149	2015
2	LNMO	MgF2	P	Mg[EtCp]2/O3, Hfac/O3, 275C, FBR	12	0.48	0.576	80	6.5-8.0	Li	3.5-4.95	45	0.1	0.1	-	0.1 mA/cm2	~101.8	-	~71.0 (20)	-	-	10.1002/cnma.201500149	2015
3	LNMO	-	-	-	-	-	-	80	8-13	Li	3.5-4.85	RT	0.1	0.1	-	0.1 mA/cm2	126	-	~30.8 (85)	1.6	1.2	10.1016/j.jpowsour.2019.227373	2020
3	LNMO	LiF	P	LiOtBut/Hfac, 220C, FBR	4	?	?	80	8-13	Li	3.5-4.85	RT	0.1	0.1	-	0.1 mA/cm2	136	-	~90.2 (85)	1.6	43	10.1016/j.jpowsour.2019.227373	2020
3	LNMO	LiF	P	LiOtBut/TiF4, 220C, FBR	4	?	?	80	8-13	Li	3.5-4.85	RT	0.1	0.1	-	0.1 mA/cm2	115	-	~82 (85)	1.6	0.12	10.1016/j.jpowsour.2019.227373	2020
4	LNMO	-	-	-	-	-	-	85	?	Li	3.5-5.0	RT	0.1	0.1	-	147	-	-	-	1.6	~109.3	10.1016/j.jpowsour.2023.232693	2023
4	LNMO	AlF3	P	TMA/O3, Hfac/O3, 150C, FBR	2	?	?	85	?	Li	3.5-5.0	RT	0.1	0.1	-	147	-	-	-	1.6	~122.5	10.1016/j.jpowsour.2023.232693	2023
4	LNMO	AlF3	P	TMA/O3, Hfac/O3, 150C, FBR	6	?	?	85	?	Li	3.5-5.0	RT	0.1	0.1	-	147	-	-	-	1.6	~106.3	10.1016/j.jpowsour.2023.232693	2023
Ni-rich NMC
5	NMC532	-	-	-	-	-	-	92	?	Li	3.0-4.3	RT	0.333	1	-	138	169	129	-	10	52	10.1116/1.4943385	2016
5	NMC532	AlF3	P	TMA/TaF5, 125C	5	1,9	-	92	?	Li	3.0-4.3	RT	0.333	1	-	138	172	133	-	10	91	10.1116/1.4943385	2016
6	NMC811	-	-	-	-	-	-	80	3,2	Li	3.0-4.25	RT	1	1	-	185	137	96	80 (190)	5	101	10.1007/s11581-022-04691-4	2022
6	NMC811	AlF3	P	TMA/HF-Pyridine, 180C	4	?	1--2	80	3,2	Li	3.0-4.25	RT	1	1	-	185	153	141	119 (190)	5	125	10.1007/s11581-022-04691-4	2022

## Sheet: Phosphates
#	Materials		ALD features					Electrochemical cycling conditions									Capacity at cycle (long-term), mAh/g			Ratecap test		Source data
	Electrode material	Coating material	Type of coating (P/E)	ALD conditions: precursors, T, reactor type	# ALD cycles	Growth rate, Å/cycle	Thickness, nm	Active material, wt%	Active material mass loading, mg/cm2	Negative electrode	Potential range, V	Temperature, °C	Charge current rate, C-units	Discharge current rate, C-units	Measurements in CCCV mode	Current at 1C, mA/g	1st	100th (if available)	largest (number of cycles), "-" if exactly 100	max C-rate, C-units (C-charge, D-discharge)	1st cycle capacity	Ref (DOI)	Year
Spinel-type materials
1	LNMO	-	-	-	-	-	-	80	?	Li	3.5-5.0	RT	0.5	0.5	-	147	~113	~90.2	-	5	~6.9	10.1002/advs.201500022	2015
1	LNMO	FePO4	P	FeCp2/O3, (CH3)3PO4/H2O, 300C	5	1	0.5	80	?	Li	3.5-5.0	RT	0.5	0.5	-	147	~109.2	~97	-	5	~61.1	10.1002/advs.201500022	2015
1	LNMO	FePO4	P	FeCp2/O3, (CH3)3PO4/H2O, 300C	10	1	1	80	?	Li	3.5-5.0	RT	0.5	0.5	-	147	~111.9	~105.1	-	5	~81.9	10.1002/advs.201500022	2015
1	LNMO	FePO4	P	FeCp2/O3, (CH3)3PO4/H2O, 300C	20	1	2	80	?	Li	3.5-5.0	RT	0.5	0.5	-	147	~106.7	~98.1	-	5	~63.6	10.1002/advs.201500022	2015
1	LNMO	FePO4	P	FeCp2/O3, (CH3)3PO4/H2O, 300C	40	1	4	80	?	Li	3.5-5.0	RT	0.5	0.5	-	147	~100.9	~101.3	-	5	~60.2	10.1002/advs.201500022	2015
2	LNMO	-	-	-	-	-	-	80	2.29-2.54	Li	3.5-5.0	RT	0.5	0.5	-	?	115	79.2	~54.3 (300)	5	~38.1	10.1016/j.nanoen.2019.103988	2019
2	LNMO	Li3PO4	P	LiOtBut/TMPO, 250C	10	1	~1	80	2.29-2.54	Li	3.5-5.0	RT	0.5	0.5	-	?	~121.7	~95.2	-	5	~53.8	10.1016/j.nanoen.2019.103988	2019
2	LNMO	TiO2	P	TTIP/H2O, 250C	10	1	~1	80	2.29-2.54	Li	3.5-5.0	RT	0.5	0.5	-	?	~114.4	~90.6	-	5	58	10.1016/j.nanoen.2019.103988	2019
2	LNMO	TiO2-Li3PO4	P	TTIP/H2O, LiOtBut/TMPO, 250C	10	1	~1	80	2.29-2.54	Li	3.5-5.0	RT	0.5	0.5	-	?	121.9	108.9	~95.5 (300)	5	60	10.1016/j.nanoen.2019.103988	2019
2	LNMO	TiO2-Li3PO4	P	TTIP/H2O, LiOtBut/TMPO, 250C	10	1	~1	80	2.29-2.54	Li	3.5-5.0	RT	1	1	-	?	~106.9	~102.6	~89.6 (300)	-	-	10.1016/j.nanoen.2019.103988	2019
Ni-rich NMC
3	NMC811	-	-	-	-	-	-	?	8.92	In	2.7-4.3	RT	?	?	-	0.178 mA/cm2	~78	~31.3	~13.7 (247)	1.78 mA/cm2	12	10.1038/s41467-022-35667-7	2023
3	NMC811	Li3PO4	P	LiOtBu/TMPO/ 250C	?	?	10	?	8.92	In	2.7-4.3	RT	?	?	-	0.178 mA/cm2	~135.7	~112.6	~ 44.9 (247)	1.78 mA/cm2	75	10.1038/s41467-022-35667-7	2023
4	NMC90	-	-	-	-	-	-	?	15 mg/?	Li-In	?	RT	0.5	0.5	-	?	~49.8	-	~24.6 (50)	1	~65.4	10.1111/jace.19685	2024
4	NMC90	Li3PO4	P	LiOtBu/TMPO/ 300C, RR	?	?	0.6	?	15 mg/?	Li-In	?	RT	0.5	0.5	-	?	~62.8	-	~23.8 (50)	1	~54.4	10.1111/jace.19685	2024
4	NMC90	Li3PO4	P	LiOtBu/TMPO/ 300C, RR	?	?	1.4	?	15 mg/?	Li-In	?	RT	0.5	0.5	-	?	~83.6	-	~25.1 (50)	1	~75	10.1111/jace.19685	2024
4	NMC90	Li3PO4	P	LiOtBu/TMPO/ 300C, RR	?	?	7.4	?	15 mg/?	Li-In	?	RT	0.5	0.5	-	?	~92.5	-	~100.9 (50)	1	~123.5	10.1111/jace.19685	2024
4	NMC90	Li3PO4	P	LiOtBu/TMPO/ 300C, RR	?	?	11.5	?	15 mg/?	Li-In	?	RT	0.5	0.5	-	?	~103.5	-	~112.5 (50)	1	~134.1	10.1111/jace.19685	2024
LLO
5	Li1.2Mn0.54Co0.13Ni0.13O2	-	-	-	-	-	-	70	?	Li	2.0-4.6	RT	0,1	0,1	-	250	235	-	212(39)	-	-	10.1016/j.nanoen.2017.02.015	2017
5	Li1.2Mn0.54Co0.13Ni0.13O2	AlPO4	P	TMA/TMPO/H2O, 250C	5	2	?	70	?	Li	2.0-4.6	RT	0,1	0,1	-	250	243	-	232(39)	-	-	10.1016/j.nanoen.2017.02.015	2017
5	Li1.2Mn0.54Co0.13Ni0.13O2	AlPO4	P	TMA/TMPO/H2O, 250C	10	2	?	70	?	Li	2.0-4.6	RT	0,1	0,1	-	250	239	-	229(39)	-	-	10.1016/j.nanoen.2017.02.015	2017
5	Li1.2Mn0.54Co0.13Ni0.13O2	AlPO4	P	TMA/TMPO/H2O, 250C	20	2	4	70	?	Li	2.0-4.6	RT	0,1	0,1	-	250	228	-	224(39)	-	-	10.1016/j.nanoen.2017.02.015	2017

## Sheet: Metals
#	Materials		ALD features					Electrochemical cycling conditions									Capacity at cycle (long-term), mAh/g			Ratecap test		Source data
	Electrode material	Coating material	Type of coating (P/E)	ALD conditions: precursors, T, reactor type	# ALD cycles	Growth rate, Å/cycle	Thickness, nm	Active material, wt%	Active material mass loading, mg/cm2	Negative electrode	Potential range, V	Temperature, °C	Charge current rate, C-units	Discharge current rate, C-units	Measurements in CCCV mode	Current at 1C, mA/g	1st	100th (if available)	largest (number of cycles), "-" if exactly 100	max C-rate, C-units (C-charge, D-discharge)	1st cycle capacity	Ref (DOI)	Year
Ni-rich NMC
1	NMC811	-	-	-	-	-	-	80	?	Li	3.0-4.5	RT	1	1	-	250	193	151	-	5	134	10.1007/s42864-022-00178-x	2022
1	NMC811	Pd	P	Pd(hfac)2/HCHO, 200C	2	-	-	80	?	Li	3.0-4.5	RT	1	1	-	250	193	157	-	5	148	10.1007/s42864-022-00178-x	2022
1	NMC811	Pd	P	Pd(hfac)2/HCHO, 200C	5	-	-	80	?	Li	3.0-4.5	RT	1	1	-	250	191	162	-	5	156	10.1007/s42864-022-00178-x	2022
1	NMC811	Pd	P	Pd(hfac)2/HCHO, 200C	8	-	-	80	?	Li	3.0-4.5	RT	1	1	-	250	184	149	-	5	150	10.1007/s42864-022-00178-x	2022
2	NMC811	-	-	-	-	-	-	80	3	Li	2.8-4.3	30	0.333	0.333	+	210	202	-	114 (98)	4	162	10.1002/smll.202104625	2022
2	NMC811	-	-	-	-	-	-	80	3	Li	2.8-4.3	30	0.2	1	+	210	193	142	121 (200)	-	-	10.1002/smll.202104625	2022
2	NMC811	Zn	P	ZnEt2 (only), 100C	-	?	tens	80	3	Li	2.8-4.3	30	0.333	0.333	+	210	194	-	139 (98)	4	170	10.1002/smll.202104625	2022
2	NMC811	Zn	P	ZnEt2 (only), 200C	-	?	tens	80	3	Li	2.8-4.3	30	0.333	0.333	+	210	211	-	171 (98)	4	174	10.1002/smll.202104625	2022
2	NMC811	Zn	P	ZnEt2 (only), 200C	-	?	tens	80	3	Li	2.8-4.3	30	0.2	1	+	210	192	172	155 (200)	-	-	10.1002/smll.202104625	2022

## Sheet: Organometallic and derivatives
#	Materials		ALD features					Electrochemical cycling conditions									Capacity at cycle (long-term), mAh/g			Ratecap test		Source data
	Electrode material	Coating material	Type of coating (P/E)	ALD conditions: precursors, T, reactor type	# ALD cycles	Growth rate, Å/cycle	Thickness, nm	Active material, wt%	Active material mass loading, mg/cm2	Negative electrode	Potential range, V	Temperature, °C	Charge current rate, C-units	Discharge current rate, C-units	Measurements in CCCV mode	Current at 1C, mA/g	1st	100th (if available)	largest (number of cycles), "-" if exactly 100	max C-rate, C-units (C-charge, D-discharge)	1st cycle capacity	Ref (DOI)	Year
Ni-rich NMC
1	NMC622	-	-	-	-	-	-	80	?	Li	3.0-4.5	25	1	1	-	200	162	132	-	8	96	10.1016/j.jallcom.2019.05.330	2019
1	NMC622	Al2O3	P	TMA/H2O, 200C	20	?	2,45	80	?	Li	3.0-4.5	25	1	1	-	200	169	147	-	8	115	10.1016/j.jallcom.2019.05.330	2019
1	NMC622	C-Al2O3	P	TMA/Fumaric acid, 200C	20	?	1,73	80	?	Li	3.0-4.5	25	1	1	-	200	186	175	-	8	136	10.1016/j.jallcom.2019.05.330	2019
1	NMC622	-	-	-	-	-	-	80	?	Li	3.0-4.5	55	0,5	0,5	-	200	195	141	-	-	-	10.1016/j.jallcom.2019.05.330	2019
1	NMC622	Al2O3	P	TMA/H2O, 200C	20	?	2,45	80	?	Li	3.0-4.5	55	0,5	0,5	-	200	203	168	-	-	-	10.1016/j.jallcom.2019.05.330	2019
1	NMC622	C-Al2O3	P	TMA/Fumaric acid, 200C	20	?	1,73	80	?	Li	3.0-4.5	55	0,5	0,5	-	200	212	191	-	-	-	10.1016/j.jallcom.2019.05.330	2019
LLO
2	0.35Li2MnO3·0.65LiNi0.35Mn0.45Co0.20O2	-	-	-	-	-	-	80	2,4	Li	2.0-4.6	30	0.333	0.333	-	250	208	-	193(99)	4	166	10.1016/j.ensm.2020.08.015	2020
2	0.35Li2MnO3·0.65LiNi0.35Mn0.45Co0.20O2	Alkylated LixSiyOz	P	tBuMe2SiLi/O3, 250C	?	?	2--5	80	2,4	Li	2.0-4.6	30	0.333	0.333	-	250	254	-	230(99)	4	204	10.1016/j.ensm.2020.08.015	2020
2	0.35Li2MnO3·0.65LiNi0.35Mn0.45Co0.20O2	-	-	-	-	-	-	80	2,4	Graphite	2.0-4.6	30	0.333	0.333	-	250	240	183	144(200)	-	-	10.1016/j.ensm.2020.08.015	2020
2	0.35Li2MnO3·0.65LiNi0.35Mn0.45Co0.20O2	Alkylated LixSiyOz	P	tBuMe2SiLi/O3, 250C	?	?	2--5	80	2,4	Graphite	2.0-4.6	30	0.333	0.333	-	250	244	216	192(200)	-	-	10.1016/j.ensm.2020.08.015	2020
2	0.35Li2MnO3·0.65LiNi0.35Mn0.45Co0.20O2	-	-	-	-	-	-	80	2,4	Graphite	2.0-4.6	30	2	2	-	250	171	133	76(200)	-	-	10.1016/j.ensm.2020.08.015	2020
2	0.35Li2MnO3·0.65LiNi0.35Mn0.45Co0.20O2	Alkylated LixSiyOz	P	tBuMe2SiLi/O3, 250C	?	?	2--5	80	2,4	Graphite	2.0-4.6	30	2	2	-	250	179	146	113(200)	-	-	10.1016/j.ensm.2020.08.015	2020
